# Supplementary material for: Childhood Maltreatment and Depression in Adulthood in Chinese Female College Students: The Mediating Effect of Coping Style
Source: Front Psychiatry. 2020 Nov 5;11:581564. doi: 10.3389/fpsyt.2020.581564 (PMC7678483; doi:10.3389/fpsyt.2020.581564)
Supplement: Supplementary file 1 [file Table_1.XLSX]

## Sheet: Sheet1
age	grade	hometown	school	SCSQ1	SCSQ2	SCSQ3	SCSQ4	SCSQ5	SCSQ6	SCSQ7	SCSQ8	SCSQ9	SCSQ10	SCSQ11	SCSQ12	SCSQ13	SCSQ14	SCSQ15	SCSQ16	SCSQ17	SCSQ18	SCSQ19	SCSQ20	HADS1	HADS2	HADS3	HADS4	HADS5	HADS6	HADS7	HADS8	HADS9	HADS10	HADS11	HADS12	HADS13	HADS14	PRCA11	PRCA12	PRCA21	PRCA22	PRCA31	PRCA32	PRCA41	PRCA42	PRCA51	PRCA52	PRCA61	PRCA62
22	3	0	0	1	2	1	1	1	2	3	3	2	2	3	0	3	1	0	0	0	0	0	1	1	1	2	0	2	1	0	0	0	2	1	1	1	0	0	0	0	0	1	0	0	0	0	0	0	0
22	3	0	0	2	3	3	2	3	2	3	3	3	3	3	2	0	0	1	0	1	0	0	1	2	1	2	0	1	0	1	0	1	1	1	2	1	1	0	0	0	0	0	0	0	0	0	0	1	2
21	3	0	0	3	2	1	2	2	1	3	3	3	3	2	0	2	0	0	0	0	0	1	3	1	0	1	0	1	0	0	0	1	0	1	1	0	0	0	0	0	0	0	0	0	0	0	0	0	0
20	2	0	0	3	3	3	2	2	2	2	2	3	2	1	3	1	0	0	0	0	1	0	3	1	0	0	0	0	0	0	0	1	0	1	1	0	0	0	0	0	0	0	0	0	0	0	0	0	0
20	2	1	0	2	0	1	2	2	2	1	0	1	2	1	1	2	0	1	0	1	1	1	3	2	1	3	1	1	1	1	0	3	1	2	1	0	1	1	1	1	1	0	0	0	0	0	0	1	1
19	2	0	0	2	3	3	3	3	1	1	3	2	2	3	3	1	1	1	1	0	3	3	3	2	0	2	1	3	0	0	0	0	1	3	2	1	0	2	1	1	1	0	0	0	0	0	0	0	0
20	2	0	0	2	1	2	2	3	1	2	1	3	2	3	1	2	0	0	0	0	0	1	1	1	0	0	0	1	1	0	0	0	1	0	1	0	1	1	1	0	0	0	0	0	0	0	0	0	0
19	2	1	0	1	1	2	1	2	1	1	2	2	1	0	3	1	0	3	3	0	2	2	2	1	2	1	0	1	0	1	1	1	0	1	1	0	3	0	0	2	2	1	1	1	2	1	1	0	0
20	2	0	0	2	2	2	2	2	1	2	2	2	2	2	2	2	0	1	1	1	1	1	1	1	1	2	0	1	0	1	1	1	0	1	1	0	0	1	1	0	0	0	0	1	0	1	0	1	0
20	2	0	0	1	3	2	2	2	2	3	3	2	2	2	1	2	0	1	1	1	2	1	3	1	1	2	0	1	0	1	0	2	0	1	1	0	1	0	0	0	0	0	0	0	0	0	0	0	0
20	2	1	0	2	1	1	1	2	1	1	2	2	2	2	1	3	0	0	1	1	2	1	1	2	1	2	1	1	0	1	2	1	1	2	1	0	1	1	1	1	1	0	0	0	0	1	1	1	1
20	2	0	0	1	3	3	3	3	3	2	3	2	2	1	2	3	0	2	2	2	1	2	2	1	1	1	0	1	1	1	2	1	0	1	2	1	2	0	0	0	0	0	0	0	0	0	0	0	0
20	2	1	0	2	3	3	3	3	3	3	3	3	3	3	2	3	2	0	0	0	0	0	1	1	1	1	1	0	0	0	0	2	0	1	1	0	0	0	0	0	0	0	0	0	0	0	0	0	0
19	2	1	0	3	2	2	3	3	3	1	2	3	3	1	3	3	0	1	1	1	1	1	3	1	1	1	1	1	1	0	0	1	1	1	1	1	1	2	2	2	3	0	0	1	2	2	1	2	3
22	2	1	0	2	2	2	2	2	1	2	1	2	2	1	2	1	0	0	0	0	0	0	1	1	1	1	0	1	0	1	0	1	0	1	1	0	0	0	0	0	0	0	0	0	0	0	0	0	0
20	2	0	0	2	2	2	2	3	2	2	3	2	2	1	1	2	0	0	2	1	0	2	2	1	1	1	0	0	0	1	0	1	0	0	0	0	0	0	0	0	0	0	0	0	0	0	0	0	0
19	2	0	0	2	2	3	3	3	3	3	3	1	2	2	1	3	0	1	1	1	1	1	2	1	1	1	0	0	0	1	0	1	0	1	0	0	1	0	0	0	0	0	0	1	1	0	0	0	0
19	2	1	0	2	2	1	1	2	2	1	1	1	1	1	2	2	2	1	1	1	2	2	2	1	2	2	1	1	2	3	3	1	0	1	3	2	1	1	0	1	1	0	0	1	0	1	0	1	0
21	2	1	0	2	2	2	2	2	2	2	2	2	2	2	2	2	2	2	2	2	2	2	2	1	1	1	0	0	1	0	2	2	0	1	1	1	2	0	0	0	0	0	0	0	0	0	0	1	0
21	3	0	0	2	3	2	2	2	0	2	3	1	0	0	1	1	0	0	1	3	2	2	3	1	0	2	0	1	1	0	3	1	1	1	2	1	0	0	0	0	0	0	0	0	0	1	1	1	1
19	2	1	0	3	0	2	2	3	2	2	0	2	2	1	2	2	0	1	1	0	1	1	2	0	1	0	0	0	0	1	1	0	0	1	0	0	3	1	2	0	0	0	0	1	1	0	0	0	0
20	2	1	0	2	3	1	1	0	1	1	2	2	2	2	2	2	1	1	2	2	1	1	1	2	0	2	2	3	1	1	0	1	1	2	2	0	3	0	0	2	2	0	0	0	0	1	1	0	0
20	2	1	0	3	3	3	3	2	2	3	3	3	3	3	3	0	3	3	3	3	3	3	3	1	0	2	0	0	0	0	0	1	0	1	1	1	0	0	0	1	1	0	0	1	1	1	1	0	0
21	2	0	0	3	3	3	3	3	3	3	3	3	3	2	3	3	1	1	0	1	1	1	3	0	1	0	0	0	0	1	1	1	0	1	1	0	0	0	0	0	0	0	0	0	0	0	0	1	0
22	2	1	0	1	2	3	1	1	1	2	1	1	2	2	1	1	2	1	2	1	0	0	1	0	1	1	0	0	0	0	1	0	0	0	1	0	3	0	0	0	0	0	0	0	0	0	0	0	0
20	2	0	0	2	3	3	3	3	2	3	2	3	2	2	1	1	0	1	0	1	1	0	2	0	1	0	0	1	0	1	1	0	0	0	1	0	0	0	0	0	0	0	0	0	0	0	0	0	0
19	2	0	0	3	3	3	2	1	3	1	3	3	2	3	2	2	0	1	0	0	1	1	3	1	0	0	0	1	0	1	1	1	0	1	1	0	0	0	0	1	1	0	0	0	0	1	1	0	0
18	2	0	0	2	3	3	3	3	2	2	3	2	1	2	2	2	1	1	1	1	0	0	1	1	1	1	0	1	0	1	2	1	0	1	1	1	0	0	0	0	0	0	0	0	0	0	0	0	0
19	2	0	0	2	3	3	3	3	2	3	3	3	3	3	3	3	0	2	2	1	2	1	3	3	1	1	0	1	2	2	2	1	1	1	1	1	0	0	0	0	0	0	0	0	0	0	0	0	0
22	3	1	0	3	3	3	3	3	2	2	3	3	3	2	1	3	0	1	1	0	0	1	3	1	1	1	0	0	0	1	0	0	0	0	1	0	0	0	0	0	0	0	0	0	0	0	0	0	0
21	3	1	0	2	2	3	3	3	2	3	3	3	3	3	2	2	0	1	1	1	1	2	2	1	0	1	0	0	0	1	1	1	0	1	1	0	0	0	0	0	0	0	0	0	0	1	1	0	0
20	3	1	0	2	2	2	2	2	3	3	2	2	2	2	2	2	1	1	1	1	0	0	1	0	0	1	0	1	1	2	0	2	1	1	1	0	0	2	2	1	2	0	0	1	1	0	0	0	0
21	3	1	0	3	2	2	1	0	2	3	3	3	3	2	2	1	0	1	1	1	1	0	1	1	1	1	0	0	0	0	0	0	0	1	0	0	1	0	0	0	0	0	0	0	0	1	1	0	0
23	3	0	0	1	2	3	3	3	3	3	3	3	3	2	1	1	0	2	0	0	2	1	1	0	0	2	0	1	0	1	0	0	0	0	0	0	0	1	0	2	0	0	0	0	0	0	0	2	1
20	3	0	0	1	0	2	2	2	1	1	1	2	3	1	2	3	1	0	0	0	0	0	1	1	1	2	1	1	2	2	3	0	0	3	1	0	3	0	0	0	0	0	0	0	0	1	1	0	0
21	3	0	0	2	2	1	0	1	1	1	2	2	2	0	2	2	0	1	0	1	2	0	1	1	1	0	1	1	0	1	0	0	1	1	2	1	1	0	0	0	0	0	0	0	0	1	1	0	0
22	3	1	0	1	3	1	0	1	2	3	1	2	3	0	3	3	0	0	0	0	0	3	3	2	1	2	1	3	1	1	0	3	1	3	2	0	0	0	0	0	0	0	0	0	0	0	0	0	0
22	3	0	0	1	2	2	1	0	1	2	1	2	2	1	3	0	0	0	0	0	1	0	1	0	1	0	0	0	0	1	0	2	0	0	0	0	0	1	0	0	0	0	0	1	0	1	0	1	0
21	3	1	0	3	1	3	3	3	2	2	2	2	1	1	2	3	0	0	2	1	2	2	3	0	0	0	0	0	0	0	2	1	0	0	1	0	0	0	0	0	0	0	0	1	1	0	0	0	0
21	3	1	0	1	2	3	2	2	1	3	1	2	1	0	3	0	0	2	1	0	2	1	1	2	1	2	0	1	0	0	0	1	0	1	1	1	3	0	0	0	0	0	0	0	0	1	1	2	3
22	3	1	0	1	3	3	3	3	2	2	3	1	0	0	1	3	0	2	2	2	2	2	2	1	0	2	0	0	1	1	2	1	2	2	1	1	1	0	1	1	0	0	0	0	0	0	0	0	0
20	3	0	0	1	3	2	2	0	2	2	3	2	3	3	3	3	0	0	3	1	1	3	3	2	0	3	0	2	0	0	0	0	1	2	2	0	0	0	0	0	0	0	0	0	0	0	0	0	0
21	3	0	0	2	2	3	3	2	3	2	2	3	2	2	2	3	0	0	1	2	2	0	1	1	0	0	0	1	0	0	0	0	0	1	1	0	0	0	0	0	0	0	0	0	0	0	0	1	1
21	2	1	0	3	3	2	2	2	1	1	3	1	1	2	2	3	1	2	1	0	1	1	3	1	1	1	0	1	1	1	1	2	1	3	1	0	0	1	1	1	2	0	0	0	0	1	2	0	0
20	2	1	0	2	2	2	3	3	3	3	2	0	1	0	1	2	0	2	2	0	1	1	1	1	3	1	1	0	0	0	1	1	0	0	1	0	3	0	0	1	1	0	0	0	0	0	0	0	0
21	2	1	0	2	3	3	1	2	2	2	3	2	3	3	1	2	1	1	1	0	1	2	3	1	0	1	0	1	0	1	1	1	0	1	1	0	1	1	1	0	0	0	0	0	0	0	0	1	0
20	2	0	0	2	1	2	3	3	2	2	2	2	2	1	1	0	0	0	0	0	1	1	1	1	1	2	1	1	2	1	1	1	1	1	1	0	0	0	0	0	0	0	0	0	0	0	0	0	0
20	2	1	0	3	1	3	3	3	2	2	1	3	3	3	3	3	0	1	0	2	1	3	3	1	1	2	1	2	2	1	0	2	1	1	1	0	0	0	0	0	0	0	0	0	0	0	0	0	0
20	2	1	0	2	1	3	2	2	2	2	1	3	2	3	3	1	0	0	0	0	2	0	3	1	1	2	1	1	1	3	0	1	1	1	1	0	3	0	0	2	1	0	0	0	0	0	0	1	2
20	2	0	0	2	3	2	3	3	2	1	1	2	2	1	2	1	1	1	1	1	2	1	2	1	1	1	0	0	0	2	1	2	0	1	1	0	1	0	0	0	0	0	0	0	0	0	0	0	0
20	2	1	0	2	2	2	2	2	2	2	3	3	2	2	3	2	0	2	2	1	1	1	3	1	1	1	1	0	1	1	0	1	0	1	1	0	1	0	0	0	0	0	0	0	0	0	0	0	0
19	2	0	0	2	2	2	2	2	2	2	2	2	2	2	2	2	1	1	1	1	3	1	2	2	1	2	1	3	2	1	2	2	0	3	2	0	1	0	0	0	0	0	0	0	0	0	0	0	0
19	2	0	0	1	1	1	2	2	2	2	3	3	3	3	0	2	0	0	0	0	0	3	2	1	0	1	2	2	2	0	2	1	2	2	1	0	2	0	0	0	0	0	0	0	0	0	0	0	0
20	2	0	0	1	2	3	2	3	1	2	2	2	0	2	2	1	0	1	2	0	0	0	2	0	1	0	0	0	0	0	0	0	0	0	0	0	0	0	0	0	0	0	0	0	0	0	0	0	0
20	2	1	0	1	2	3	3	2	1	1	2	2	2	1	3	3	0	1	2	1	1	1	2	1	1	1	0	1	0	0	1	1	0	1	0	0	0	0	0	0	0	0	0	0	0	0	0	0	0
21	2	1	0	2	3	2	0	0	2	1	3	2	3	1	3	3	0	3	3	3	2	3	3	1	1	1	0	0	0	0	1	0	1	0	0	0	0	1	1	0	0	0	0	0	0	0	0	3	2
20	2	1	0	1	2	3	3	3	2	2	2	2	1	3	2	3	0	1	1	0	1	0	2	1	0	0	0	0	0	1	1	1	0	1	0	0	1	0	0	0	0	0	0	0	0	0	0	1	1
19	2	0	0	1	3	3	3	3	2	3	3	3	3	1	1	2	0	1	0	2	1	1	2	0	1	1	0	1	0	2	0	1	1	1	1	1	3	0	0	0	0	0	0	0	0	0	0	0	0
19	2	0	0	2	3	2	2	2	2	1	1	2	2	2	3	3	0	1	1	1	1	0	1	1	1	2	0	0	0	1	1	1	0	1	1	0	0	0	0	0	0	0	0	0	0	0	0	0	0
20	2	0	0	2	1	1	1	1	1	2	1	1	2	1	2	2	1	0	1	1	1	1	2	1	0	2	1	1	1	1	2	1	1	1	1	1	0	0	0	0	0	0	0	0	0	0	0	0	0
21	2	0	0	1	2	3	1	3	3	3	3	1	1	3	3	3	0	0	1	1	0	1	3	0	1	0	0	0	0	0	1	0	0	0	1	0	0	0	0	0	0	0	0	0	0	0	0	0	0
19	2	1	0	3	1	3	3	3	2	3	1	2	3	1	3	3	1	1	1	1	1	1	1	1	1	0	0	0	1	1	0	1	0	1	1	1	1	0	0	0	0	0	0	0	0	1	2	1	2
20	2	0	0	2	2	3	2	1	2	2	2	3	3	3	0	0	0	0	0	1	1	0	1	1	1	1	0	1	0	1	0	0	0	1	1	0	0	0	0	0	0	0	0	0	0	0	0	0	0
20	2	1	0	2	3	3	2	1	1	3	3	3	3	2	1	2	0	1	1	1	1	0	2	1	1	2	0	1	0	0	0	1	1	1	1	0	0	0	0	0	0	0	0	1	0	0	0	0	0
19	2	1	0	3	3	3	3	3	3	3	3	3	3	3	1	2	0	1	1	1	1	1	2	1	1	1	0	0	0	0	1	1	0	1	1	0	0	0	0	0	0	0	0	0	0	0	0	0	0
20	2	0	0	1	2	2	3	3	2	2	2	2	2	1	2	3	0	1	1	1	1	2	2	1	1	1	1	1	1	1	0	1	1	2	1	1	1	0	0	0	0	0	0	0	0	0	0	0	0
20	2	0	0	1	2	1	1	1	1	2	2	1	1	0	0	2	0	1	0	0	1	1	1	1	1	0	1	2	1	1	2	1	1	1	1	0	1	0	0	0	0	0	0	1	1	1	2	0	0
20	2	0	0	2	2	2	3	3	2	2	3	2	1	2	2	2	0	3	2	2	2	1	3	1	1	1	0	2	1	1	0	1	1	1	1	0	1	1	2	0	0	0	0	2	2	1	1	2	3
20	2	1	0	2	2	2	3	3	1	2	2	2	2	2	2	2	2	2	2	1	2	2	2	2	1	2	1	3	3	2	1	1	1	2	2	1	1	0	0	0	0	0	0	0	0	0	0	0	0
21	3	0	0	3	2	1	3	3	2	2	2	2	1	1	2	2	0	3	3	1	3	1	3	2	1	2	1	1	1	2	2	1	1	1	1	0	1	0	0	1	0	0	0	1	4	1	1	1	0
20	1	1	0	2	3	3	2	1	2	2	2	2	2	2	2	1	0	1	1	1	0	0	1	1	0	0	0	0	0	0	1	1	0	0	0	0	1	0	0	1	1	0	0	0	0	0	0	0	0
19	1	1	0	3	2	3	3	3	2	2	2	2	1	1	3	3	0	1	1	2	0	1	1	1	1	2	1	1	2	1	2	0	1	1	2	2	1	0	0	0	0	0	0	1	1	1	1	1	1
18	1	0	0	2	3	1	2	2	2	2	3	1	2	3	1	1	0	1	1	1	0	0	1	1	1	1	0	0	0	1	0	1	0	1	1	0	0	0	0	0	0	0	0	0	0	0	0	0	0
20	1	0	0	0	1	3	3	2	1	1	2	2	3	2	3	2	0	0	1	2	1	1	3	1	2	0	0	2	0	1	1	1	1	0	1	0	3	0	0	0	0	0	0	0	0	0	0	0	0
19	1	1	0	1	3	2	1	1	2	2	3	2	3	3	2	3	0	3	3	3	2	3	3	2	0	2	1	3	1	2	1	2	1	3	2	1	1	0	0	0	0	0	0	0	0	0	0	0	0
19	1	0	0	1	3	2	3	3	3	3	3	3	3	2	3	2	2	1	0	1	1	3	3	1	1	2	1	1	2	2	1	1	1	1	2	1	1	1	1	2	1	0	0	0	0	1	1	1	1
19	1	1	0	0	1	0	2	0	2	1	1	2	2	1	0	2	1	1	2	2	2	2	3	2	2	2	2	2	2	2	3	1	1	3	3	1	2	0	0	0	0	0	0	0	0	1	0	0	0
19	1	0	0	3	3	3	3	3	3	3	2	3	1	3	1	2	0	0	0	1	2	1	2	1	0	1	0	0	0	0	0	1	0	0	0	0	0	0	0	0	0	0	0	0	0	0	0	0	0
18	1	0	0	2	1	2	1	2	0	1	2	1	1	1	2	0	0	0	0	0	0	1	1	0	2	1	0	0	0	1	0	2	0	0	0	0	1	0	0	0	0	0	0	0	0	0	0	0	0
20	1	1	0	3	1	2	2	2	3	1	2	3	3	3	3	1	0	0	1	0	1	1	1	1	1	1	2	1	2	0	1	1	0	1	1	0	1	0	0	0	0	0	0	0	0	0	0	0	0
18	1	0	0	1	1	1	1	1	1	1	1	2	1	3	1	1	0	0	1	1	1	2	1	1	1	2	0	1	1	1	0	2	1	2	1	1	1	1	1	0	0	0	0	0	0	1	1	0	0
19	1	1	0	1	0	1	1	2	0	1	0	1	0	1	3	3	1	1	3	3	3	3	3	2	1	2	1	2	2	1	1	1	1	2	2	1	0	1	1	1	1	0	0	1	3	2	1	1	1
19	1	1	0	1	2	3	3	2	1	3	3	2	1	0	3	0	0	0	1	0	2	1	3	1	0	0	0	0	0	0	1	1	0	0	0	0	1	0	0	0	0	0	0	0	0	0	0	0	0
19	1	1	0	2	3	3	3	2	2	2	3	3	3	2	2	3	0	1	1	2	0	0	2	1	1	1	0	0	0	0	0	1	0	1	1	0	0	0	0	0	0	0	0	0	0	0	0	0	0
19	1	0	0	3	3	3	3	2	1	2	2	1	1	1	3	3	0	1	1	1	0	0	0	1	1	1	0	1	0	1	0	1	0	1	1	0	1	0	0	0	0	0	0	0	0	0	0	0	0
19	1	0	0	3	2	3	3	3	3	3	2	3	3	3	3	2	0	1	0	0	2	2	3	1	1	1	0	2	0	1	1	1	0	1	1	2	0	0	0	0	0	0	0	1	1	0	0	0	0
20	1	0	0	3	3	2	3	3	3	3	3	3	3	2	3	3	0	0	1	0	0	1	3	1	1	0	1	1	0	1	0	1	1	1	1	0	0	0	0	0	0	0	0	0	0	0	0	0	0
18	1	0	0	1	2	3	3	2	3	3	1	3	3	1	3	1	0	3	1	1	0	2	3	1	1	1	0	1	0	1	1	1	0	1	1	1	0	0	0	0	0	0	0	0	0	0	0	0	0
18	1	1	0	3	1	2	1	1	2	2	1	2	2	1	3	2	0	0	0	1	1	2	2	1	1	0	0	1	0	1	1	1	1	1	1	1	0	0	0	0	0	0	0	0	0	0	0	0	0
17	1	1	0	1	3	3	2	0	2	1	0	2	3	0	3	0	0	0	0	0	0	0	1	1	1	2	0	0	0	1	0	1	0	1	1	1	1	0	0	0	0	0	0	0	0	0	0	0	0
18	1	0	0	3	1	3	3	3	3	2	1	2	3	3	3	3	0	3	1	0	3	1	3	1	0	0	0	0	0	0	1	0	0	1	1	0	0	1	1	1	1	0	0	0	0	0	0	1	1
18	1	1	0	1	3	1	3	1	2	1	2	1	2	1	3	2	1	0	2	1	2	3	3	1	1	0	1	1	1	2	1	1	1	0	1	0	2	0	0	0	0	0	0	0	0	0	0	0	0
18	1	1	0	1	3	3	3	3	3	1	3	3	3	3	1	3	0	1	1	1	2	3	3	1	1	2	0	1	0	1	0	0	0	1	1	1	2	0	0	0	0	0	0	0	0	0	0	0	0
18	1	1	0	3	3	3	3	3	3	2	3	3	2	2	3	3	0	0	0	1	0	1	1	0	1	2	0	0	0	0	2	1	0	1	1	1	0	0	0	0	0	0	0	0	0	0	0	0	0
19	1	0	0	3	3	2	2	1	1	3	3	2	2	2	1	2	0	1	1	1	1	2	2	1	1	1	0	1	0	2	1	2	1	1	1	0	0	0	0	0	0	0	0	0	0	1	1	0	0
19	1	1	0	3	2	3	2	2	2	3	1	2	1	2	3	3	0	1	2	2	1	3	2	1	1	2	1	1	0	2	0	2	0	1	1	1	2	0	0	0	0	0	0	0	0	0	0	0	0
20	1	1	0	2	2	2	2	2	2	1	1	1	2	2	0	3	0	2	3	1	1	3	3	1	1	2	0	1	2	0	0	2	1	2	1	1	0	0	0	0	0	0	0	0	0	0	0	0	0
19	1	0	0	1	2	0	0	0	0	0	3	0	0	0	3	0	1	0	3	3	3	0	0	3	3	3	2	3	1	3	1	3	2	3	2	1	3	1	1	0	0	0	0	0	0	0	0	1	1
18	1	0	0	3	2	3	2	3	3	3	3	3	3	2	2	3	0	0	1	1	1	1	2	1	1	1	0	1	1	2	1	1	0	1	1	0	2	0	0	0	0	0	0	0	0	0	0	0	0
19	1	0	0	1	3	2	3	3	2	1	1	1	0	0	1	3	0	0	0	0	2	1	1	1	1	0	0	0	0	1	0	0	0	1	1	0	1	0	0	0	0	0	0	0	0	0	0	0	0
19	1	0	0	3	3	3	2	1	2	2	3	2	2	2	3	2	0	0	0	0	0	1	2	1	1	2	1	1	0	1	0	1	0	1	1	0	0	0	0	0	0	0	0	0	0	0	0	0	0
18	1	1	0	2	3	2	3	1	2	2	2	2	3	2	2	1	0	0	0	0	1	0	2	1	1	2	2	2	2	1	2	1	1	2	1	0	1	0	0	0	0	0	0	0	0	0	0	0	0
19	1	1	0	0	2	1	1	0	3	2	2	0	1	1	2	3	0	0	0	1	0	2	2	2	1	3	1	2	2	2	0	1	2	3	2	0	3	0	0	0	0	0	0	0	0	1	1	0	0
20	1	0	0	2	2	1	2	2	2	1	2	2	2	1	1	2	2	1	1	1	0	2	2	1	2	2	2	0	1	1	0	1	0	1	1	1	0	0	0	0	0	0	0	0	0	0	0	0	0
21	1	1	0	2	3	3	3	2	1	3	2	2	2	1	3	1	0	0	0	0	0	0	2	1	1	0	1	0	2	2	1	0	0	0	1	0	0	0	0	0	0	0	0	0	0	0	0	0	0
18	1	1	0	2	3	3	2	3	3	2	2	3	2	1	3	1	0	1	2	0	0	0	1	1	0	0	2	0	0	0	1	1	0	2	1	0	0	0	0	0	0	0	0	0	0	0	0	0	0
19	1	1	0	1	2	2	2	1	1	1	2	2	2	1	1	0	0	0	0	0	1	1	1	1	0	1	0	1	1	1	2	1	1	1	1	1	0	1	1	0	0	0	0	0	0	0	0	0	0
18	1	1	0	1	2	2	1	1	2	3	2	1	1	1	3	3	0	2	1	0	0	0	3	1	1	0	1	0	1	1	2	0	0	0	1	0	1	0	0	0	0	0	0	0	0	0	0	0	0
19	1	1	0	1	2	3	2	3	1	1	2	3	3	3	2	3	0	1	0	1	1	3	3	1	0	2	0	0	0	1	1	1	0	2	1	1	0	0	0	0	0	0	0	0	0	0	0	0	0
21	3	0	0	1	1	2	2	2	2	2	1	2	2	2	2	2	0	0	2	1	1	2	2	1	0	1	1	1	0	1	2	1	1	1	1	0	1	0	0	0	0	0	0	0	0	0	0	0	0
20	3	0	0	2	3	3	3	2	3	3	3	2	2	2	3	2	0	1	2	2	2	2	3	1	1	1	0	1	0	1	0	1	0	1	0	1	1	0	0	0	0	0	0	0	0	0	0	0	0
20	3	0	0	1	2	1	2	0	2	3	1	2	2	2	1	3	1	0	1	1	0	1	2	2	0	2	0	2	1	1	0	1	1	2	2	1	0	0	0	0	0	0	0	0	0	1	2	0	0
21	3	0	0	1	2	1	2	2	1	2	2	2	3	3	2	3	0	1	1	2	2	1	3	1	0	2	0	1	1	1	0	1	1	2	1	2	1	0	0	0	0	0	0	0	0	0	0	0	0
18	1	1	0	2	2	1	1	2	2	2	1	2	1	2	3	1	1	2	2	1	2	3	3	1	1	1	0	1	1	1	0	1	0	2	1	2	1	2	1	0	0	0	0	2	1	1	0	1	0
17	1	0	0	2	4	1	2	3	1	0	2	2	2	1	1	3	0	0	1	2	1	1	3	1	0	1	0	1	0	1	1	1	1	1	1	0	1	0	0	0	0	0	0	0	0	0	0	0	0
18	1	0	0	2	3	1	3	3	2	2	3	2	1	3	1	1	0	0	0	1	0	0	1	0	1	0	0	0	0	1	0	1	0	0	0	0	0	0	0	0	0	0	0	0	0	0	0	0	0
18	1	1	0	3	3	2	1	0	3	3	3	3	3	3	3	3	0	1	1	3	1	3	3	1	0	0	0	0	0	0	0	1	0	2	1	0	0	0	0	0	0	0	0	0	0	0	0	0	0
18	1	0	0	1	2	2	1	0	2	1	2	2	1	2	2	2	0	2	1	1	1	2	3	2	2	0	1	3	3	2	0	1	1	1	1	1	1	0	0	0	0	0	0	0	0	0	0	0	0
18	1	1	0	2	1	2	2	1	1	1	3	2	2	2	3	2	0	1	0	1	1	1	3	1	1	1	2	1	2	2	1	1	1	1	1	1	1	0	0	1	2	0	0	0	0	1	1	1	1
19	1	0	0	2	3	1	1	0	2	2	2	2	2	1	0	0	0	0	0	2	2	2	2	1	1	2	0	1	0	1	0	2	0	2	2	0	1	0	0	0	0	0	0	0	0	0	0	1	1
19	1	1	0	3	2	3	3	2	3	2	2	2	3	2	3	3	0	0	0	0	0	1	3	1	1	2	1	1	1	1	1	1	1	1	1	0	1	0	0	0	0	0	0	0	0	0	0	1	0
22	3	0	4	2	3	2	2	2	1	1	2	1	2	1	1	1	0	1	1	1	1	1	2	1	1	1	1	1	2	2	1	1	1	2	2	2	1	0	0	0	0	0	0	0	0	0	0	0	0
21	3	0	1	2	1	1	2	1	1	3	2	1	1	2	2	1	2	1	1	1	2	1	1	1	1	1	0	1	1	1	0	1	1	1	1	0	0	0	0	0	0	0	0	0	0	0	0	0	0
19	2	1	1	3	3	3	3	3	3	3	3	3	3	3	3	3	0	1	1	1	1	1	3	1	1	1	0	1	0	1	2	1	0	1	1	0	0	0	0	0	0	0	0	0	0	0	0	0	0
20	2	0	1	1	1	2	3	3	1	1	1	2	2	1	2	2	0	0	1	0	1	1	1	2	1	1	0	2	2	1	0	1	1	2	2	2	0	0	0	0	0	0	0	0	0	0	0	0	0
20	2	0	1	3	2	1	3	2	1	3	2	2	2	2	3	2	3	1	2	1	3	2	2	1	1	2	2	1	2	1	0	2	1	2	1	2	1	0	0	0	0	0	0	1	1	1	3	0	0
18	1	0	1	2	3	3	3	2	2	2	1	2	2	2	2	2	0	2	1	2	1	1	2	1	1	2	0	1	0	1	1	2	0	2	1	1	1	0	0	0	0	0	0	0	0	0	0	0	0
23	4	1	1	2	3	3	2	1	2	3	3	1	3	3	2	2	0	2	0	1	1	0	3	1	1	2	0	0	0	1	0	2	0	1	0	0	1	0	0	0	0	0	0	0	0	0	0	0	0
20	2	0	1	1	2	1	2	1	3	3	2	1	1	1	1	2	0	1	3	1	1	2	1	1	1	2	1	2	2	2	3	1	1	2	2	1	2	0	0	0	0	0	0	0	0	0	0	0	0
20	3	1	1	3	3	3	3	2	3	2	3	3	2	2	2	3	0	1	1	2	1	1	2	1	0	2	0	1	0	1	0	1	0	1	1	1	0	1	1	0	0	0	0	0	0	1	1	0	0
19	2	0	1	3	1	2	3	3	2	3	2	2	3	3	1	1	0	0	0	0	1	0	3	1	0	1	0	0	0	1	1	1	0	1	1	0	1	0	0	0	0	0	0	0	0	0	0	0	0
21	3	0	1	2	3	3	2	3	2	2	3	3	3	2	1	3	0	1	1	1	1	1	3	1	1	0	0	0	0	1	1	1	0	1	1	1	0	0	0	0	0	0	0	0	0	0	0	0	0
21	3	0	1	3	1	2	3	3	2	2	3	3	3	2	2	0	2	1	0	1	1	2	3	1	1	1	1	1	1	2	0	1	0	1	1	0	0	0	0	0	0	0	0	0	0	0	0	0	0
20	3	0	1	3	3	3	3	3	3	3	3	3	3	3	3	2	0	1	0	2	2	0	1	1	0	1	0	1	0	0	0	1	1	1	1	0	0	0	0	0	0	0	0	0	0	0	0	0	0
21	2	0	1	2	2	1	1	2	2	3	2	2	2	2	1	1	0	0	0	0	3	0	2	1	0	2	1	1	2	2	0	1	1	2	2	0	0	0	0	0	0	0	0	0	0	2	2	0	0
18	2	0	1	1	2	3	3	3	3	3	1	2	2	2	2	0	0	0	0	1	0	0	0	1	0	0	0	1	0	2	0	1	0	1	0	1	0	0	0	0	0	0	0	0	0	0	0	0	0
21	3	0	1	1	1	1	1	1	1	2	1	2	1	3	2	3	0	2	2	1	2	2	2	2	1	2	0	2	0	1	0	1	1	2	2	1	0	1	1	0	0	0	0	0	0	0	0	0	0
20	2	1	1	3	3	3	3	1	2	1	2	1	1	2	2	1	2	1	1	0	1	2	2	1	1	2	1	1	1	1	0	2	1	2	1	1	1	2	1	0	0	0	0	0	0	0	0	1	1
20	2	1	1	2	2	2	2	2	3	2	2	2	2	3	2	2	0	2	1	1	1	2	3	1	1	1	1	1	1	2	0	1	1	1	1	0	1	0	0	1	1	0	0	0	0	0	0	0	0
20	3	0	1	2	3	1	2	2	3	2	3	2	2	2	1	1	1	0	0	1	1	0	2	1	1	2	1	1	2	2	0	1	1	2	1	1	1	0	0	0	0	0	0	0	0	0	0	1	1
21	3	1	1	3	2	3	3	3	2	2	2	2	3	2	3	3	0	1	2	2	1	1	3	1	1	1	0	1	0	0	1	1	0	2	1	0	0	0	0	0	0	0	0	0	0	0	0	0	0
19	1	0	1	3	3	2	3	3	3	3	3	3	3	3	2	2	0	1	1	1	2	2	2	1	1	2	0	1	0	1	1	2	0	2	2	1	1	0	0	0	0	0	0	0	0	1	1	0	0
21	3	0	1	1	2	2	2	2	1	1	2	2	1	2	2	2	0	2	2	1	1	2	2	1	1	1	1	1	1	1	0	1	1	1	1	1	1	0	0	0	0	0	0	0	0	1	1	0	0
20	1	1	1	2	3	3	2	2	1	1	2	2	2	0	1	2	0	0	0	2	1	2	1	1	1	1	0	0	0	0	1	1	0	1	1	1	1	0	0	1	0	0	0	0	0	0	0	0	0
20	1	0	1	2	1	1	2	1	1	2	1	2	0	2	2	2	1	2	1	0	1	2	1	2	2	1	2	2	2	2	1	1	2	2	1	2	1	0	0	0	0	0	0	0	0	0	0	0	0
20	2	0	1	2	2	3	2	3	1	2	2	2	2	1	2	3	1	0	1	2	1	2	2	1	1	1	1	1	1	1	2	2	1	2	1	0	3	1	0	1	0	0	0	0	0	0	0	0	0
20	3	1	1	2	3	3	3	2	2	2	2	2	1	2	2	1	0	1	1	0	2	0	2	1	0	0	0	0	0	1	2	1	0	0	1	2	0	0	0	0	0	0	0	0	0	0	0	0	0
19	1	1	1	3	3	3	3	3	1	1	1	1	1	1	1	1	1	1	2	2	2	2	2	1	2	2	0	0	2	2	0	1	0	2	1	1	0	0	0	0	0	0	0	0	0	0	0	0	0
19	1	0	1	2	2	2	2	2	2	2	2	2	2	1	1	0	0	1	0	1	1	1	1	1	1	0	0	0	2	2	0	1	0	1	1	1	1	0	0	0	0	0	0	0	0	0	0	0	0
20	3	0	1	2	2	3	2	3	3	3	3	3	3	2	3	3	0	1	1	1	1	1	3	1	1	2	0	2	0	2	2	3	1	3	1	1	1	0	0	0	0	0	0	0	0	0	0	0	0
21	3	0	1	1	2	1	2	2	2	2	2	2	2	1	2	3	1	1	2	1	2	1	2	1	1	2	1	2	1	0	2	0	1	2	2	1	1	0	0	1	1	0	0	0	0	1	1	0	0
20	2	0	1	1	1	1	1	1	2	0	1	2	0	0	0	2	0	2	2	1	1	1	1	1	1	3	0	1	0	2	1	1	0	1	1	1	3	0	0	0	0	0	0	0	0	0	0	1	0
20	2	1	5	2	3	1	2	2	1	2	2	2	1	1	2	2	0	1	2	2	3	1	2	1	1	2	2	1	1	0	1	1	0	1	1	0	1	0	0	0	0	0	0	0	0	0	0	0	0
19	2	0	1	1	2	2	2	2	2	2	2	2	2	2	2	0	0	0	0	0	0	0	0	1	1	2	1	1	1	1	1	1	0	3	2	0	0	0	0	0	0	0	0	0	0	0	0	0	0
22	4	0	1	2	3	3	3	2	1	3	2	3	3	2	1	1	2	1	3	1	2	0	1	0	1	1	0	0	0	0	0	1	0	1	1	1	0	0	0	0	0	0	0	0	0	0	0	0	0
19	1	1	0	2	2	2	2	2	2	2	2	2	2	2	2	1	0	1	1	2	2	3	2	1	1	2	0	1	1	0	1	1	0	1	1	0	0	0	0	0	0	0	0	0	0	0	0	0	0
18	1	1	0	1	1	1	2	2	1	2	1	2	2	1	2	2	0	0	1	1	1	0	1	1	1	0	2	0	0	1	1	0	1	1	1	1	0	1	1	0	0	0	0	1	1	2	2	2	2
19	1	0	0	3	3	3	3	2	2	3	3	3	2	3	2	2	1	1	1	1	3	1	3	1	1	1	0	0	0	1	2	1	0	1	1	1	0	0	0	0	0	0	0	0	0	0	0	1	1
19	1	1	0	1	3	3	3	2	3	2	2	1	3	3	3	3	0	0	0	1	0	1	1	1	1	1	0	0	0	1	1	1	0	0	0	1	0	0	0	0	0	0	0	0	0	0	0	0	0
19	1	0	0	2	1	2	2	2	2	2	2	2	2	2	2	2	0	1	1	1	1	1	2	1	1	0	0	1	0	1	0	1	0	0	1	0	1	0	0	0	0	0	0	0	0	0	0	0	0
20	1	1	0	0	2	3	3	3	3	0	1	1	2	0	3	3	0	3	0	0	0	3	1	1	0	1	0	2	1	1	0	2	0	1	1	1	0	0	0	0	0	0	0	0	0	0	0	0	0
19	1	0	0	0	2	1	1	2	0	1	1	1	0	2	2	3	2	1	2	1	1	1	2	1	1	2	1	2	1	2	0	2	1	2	2	1	3	0	0	0	0	0	0	0	0	0	0	0	0
18	1	1	0	1	3	3	3	2	2	1	3	2	1	1	2	3	0	1	2	0	1	1	2	1	1	2	0	1	0	1	2	1	0	1	1	1	1	0	0	0	0	0	0	0	0	0	0	0	0
19	1	1	0	3	3	0	2	2	1	3	3	3	3	1	3	3	0	0	1	0	3	1	3	1	3	0	1	0	0	0	0	2	3	0	0	0	1	0	0	0	0	0	0	0	0	0	0	1	2
18	1	1	0	2	2	1	2	2	2	2	2	2	2	2	1	2	1	1	1	1	1	1	2	1	0	1	0	0	0	1	0	1	0	1	1	1	0	0	0	0	0	0	0	0	0	0	0	0	0
19	1	1	0	2	2	2	2	3	2	1	1	2	2	1	2	2	0	1	0	1	1	1	2	1	1	1	1	1	2	1	1	2	1	1	2	1	1	0	0	0	0	0	0	0	0	0	0	0	0
18	1	0	0	2	3	3	3	3	1	1	3	1	3	3	3	3	0	1	1	1	0	1	2	1	0	0	0	0	0	1	0	0	1	1	1	0	0	0	0	0	0	0	0	0	0	0	0	0	0
18	1	0	0	1	2	2	2	2	2	1	1	2	2	2	2	2	0	1	2	1	1	1	1	1	1	0	0	0	0	1	0	1	0	0	1	1	0	0	0	0	0	0	0	0	0	0	0	0	0
18	1	1	0	2	2	2	2	3	1	2	3	3	2	1	3	1	0	1	1	2	2	0	1	1	1	1	1	1	1	1	2	1	1	1	2	0	1	0	0	0	0	0	0	0	0	0	0	0	0
18	1	1	0	3	3	3	3	3	1	2	3	3	1	2	3	1	0	0	0	1	2	0	3	1	1	1	0	1	0	1	2	1	0	0	1	1	1	0	0	0	0	0	0	0	0	1	1	0	0
19	1	1	0	3	2	2	2	2	3	2	3	3	3	2	3	3	0	1	0	0	1	0	1	1	0	1	0	1	0	1	2	1	0	1	1	0	0	0	0	0	0	0	0	0	0	1	0	0	0
19	1	0	0	2	3	3	1	1	3	3	3	3	3	1	2	1	0	0	1	1	0	1	3	0	1	0	0	0	0	0	2	0	0	0	0	0	1	0	0	0	0	0	0	0	0	0	0	0	0
19	1	0	0	2	3	2	2	2	1	2	2	2	2	1	1	1	0	0	0	1	2	0	2	1	0	1	0	0	0	0	0	0	0	0	1	1	1	0	0	0	0	0	0	0	0	0	0	0	0
19	1	0	0	1	3	1	2	2	2	1	3	0	0	1	2	1	2	0	0	0	0	0	1	1	1	1	1	2	2	2	1	1	2	2	2	1	1	1	1	0	0	1	0	0	0	1	2	1	1
20	1	1	0	2	2	3	3	3	3	3	1	2	1	1	1	0	0	0	0	0	3	0	0	0	1	0	0	0	0	1	1	1	0	0	0	0	0	0	0	0	0	0	0	0	0	0	0	0	0
19	1	1	0	2	2	2	2	2	2	1	2	2	2	1	1	1	0	0	0	2	1	1	1	1	0	0	0	0	0	1	0	0	0	0	1	1	0	0	0	0	0	0	0	0	0	2	0	1	0
18	1	1	0	2	3	2	3	2	2	3	3	2	2	2	2	1	0	0	1	1	2	0	3	0	0	1	0	1	1	1	0	1	0	1	1	0	1	0	0	0	0	0	0	0	0	0	0	0	0
18	1	1	0	2	2	3	3	3	2	2	2	2	2	2	2	2	0	1	0	1	1	0	1	0	1	0	0	0	0	0	0	0	0	0	0	0	0	0	0	0	0	0	0	0	0	0	0	0	0
20	1	1	0	2	1	2	2	1	2	1	1	2	2	2	1	1	0	1	1	1	1	1	1	1	1	1	0	1	1	2	1	1	1	1	1	1	2	0	0	1	1	0	0	0	0	1	1	0	0
18	1	0	0	3	2	3	2	1	3	2	1	1	1	3	2	2	1	1	1	0	2	0	3	1	0	1	0	1	1	1	2	1	0	1	1	0	0	0	0	0	0	0	0	0	0	0	0	0	0
19	1	0	0	3	2	3	2	2	1	1	2	3	3	3	3	2	0	1	1	1	1	2	2	1	0	0	0	1	0	1	1	1	0	0	1	0	0	0	0	0	0	0	0	0	0	0	0	0	0
18	1	0	0	3	3	3	3	3	2	3	2	3	3	2	1	0	0	0	0	0	1	0	0	1	1	0	0	0	0	1	0	1	0	0	1	0	0	0	0	0	0	0	0	0	0	0	0	0	0
19	1	1	0	2	3	3	3	3	1	2	2	2	1	1	2	1	0	1	0	1	1	1	2	1	1	0	0	0	0	1	1	0	0	0	1	0	0	0	0	0	0	0	0	0	0	0	0	0	0
19	1	0	0	1	2	2	2	2	1	2	2	1	1	2	1	1	2	2	1	1	2	2	2	1	1	2	1	2	2	1	1	1	2	1	1	2	2	0	0	0	0	0	0	0	0	0	0	0	0
18	1	1	0	2	3	2	3	1	2	2	3	2	2	2	2	3	0	0	1	1	1	0	2	1	1	1	0	1	0	0	0	1	0	1	1	0	1	0	0	1	0	0	0	0	0	0	0	1	0
20	1	1	0	1	1	1	2	3	2	2	1	2	1	0	2	1	0	2	2	1	1	1	3	1	1	2	2	2	1	2	1	1	1	1	1	0	3	1	1	0	0	0	0	0	0	0	0	0	0
19	1	1	0	1	3	3	1	2	1	0	1	1	1	0	1	1	0	1	0	1	1	1	1	1	1	1	0	1	0	0	0	1	0	1	1	1	1	0	0	0	0	0	0	0	0	0	0	1	0
18	1	1	0	3	2	3	3	3	3	3	1	2	2	1	1	2	0	1	1	1	1	1	2	1	1	0	0	0	1	1	0	1	0	0	1	0	1	0	0	0	0	0	0	0	0	0	0	0	0
18	1	1	0	3	3	3	3	3	2	2	2	2	1	1	1	2	0	0	0	0	0	1	2	1	1	1	0	0	0	1	1	1	0	1	1	0	1	0	0	0	0	0	0	0	0	0	0	0	0
19	1	1	0	2	2	2	3	3	3	3	2	2	2	3	1	2	0	1	0	1	0	0	1	1	0	1	1	0	0	1	0	0	0	1	0	0	1	0	0	0	0	0	0	0	0	0	0	1	0
19	1	0	0	2	1	2	3	3	2	2	2	3	2	1	3	2	0	1	1	1	1	1	2	1	0	2	1	1	1	1	2	1	1	1	1	1	1	0	0	0	0	0	0	0	0	0	0	0	0
18	1	0	0	1	2	2	1	1	2	2	2	2	2	2	2	2	2	1	1	1	1	1	1	1	0	1	1	2	1	1	1	1	0	0	0	0	0	0	0	0	0	0	0	0	0	0	0	0	0
19	1	0	0	2	3	3	3	2	1	2	3	2	1	1	2	2	0	1	1	1	2	0	2	0	0	0	0	0	0	0	0	0	0	0	0	0	0	0	0	0	0	0	0	0	0	0	0	0	0
19	1	0	0	3	3	3	1	0	3	3	3	3	3	1	3	3	0	0	0	0	0	0	3	1	0	2	1	2	1	3	1	3	0	2	1	1	2	0	0	0	0	0	0	0	0	0	0	0	0
18	1	0	0	0	3	2	1	1	1	2	3	3	3	2	2	2	0	0	0	1	1	0	1	2	1	0	2	1	1	1	1	0	1	2	1	0	0	0	0	0	0	0	0	0	0	0	0	0	0
18	1	0	0	3	2	2	2	2	2	1	2	2	2	2	1	2	0	0	0	0	0	0	1	1	0	1	0	0	0	1	2	1	0	1	0	0	0	0	0	0	0	0	0	0	0	1	0	1	0
19	1	1	0	2	2	2	2	2	1	1	3	2	2	3	2	3	0	1	0	1	1	1	2	1	1	0	0	0	0	1	0	1	0	1	0	1	0	0	0	0	0	0	0	0	0	0	0	0	0
20	1	0	0	3	1	2	0	3	1	2	1	1	1	2	1	2	0	1	2	1	1	2	2	1	1	0	0	1	1	0	2	1	0	0	1	0	0	0	0	0	0	0	0	0	0	0	0	0	0
19	1	0	0	2	3	3	3	3	3	3	3	3	3	3	0	1	0	1	0	0	0	0	0	0	0	0	0	0	0	0	0	0	0	0	1	1	0	0	0	0	0	0	0	0	0	0	0	0	0
18	1	0	0	2	2	2	2	3	2	2	3	2	2	2	3	3	1	1	0	1	3	2	3	1	0	1	0	2	1	1	0	1	1	2	1	1	0	0	0	0	0	1	0	0	0	2	1	1	1
20	1	1	0	1	2	2	1	1	2	2	2	2	2	2	1	1	0	1	0	1	1	0	1	1	1	2	0	0	0	1	0	3	0	1	1	0	0	0	0	0	0	0	0	0	0	0	0	0	0
18	1	0	0	2	3	3	3	2	2	2	3	2	2	2	3	3	0	1	1	2	2	1	2	1	1	1	0	0	0	1	0	1	0	1	1	1	0	0	0	0	0	0	0	0	0	0	0	0	0
20	1	0	0	3	3	3	3	3	3	3	3	3	3	2	3	3	2	2	2	1	2	3	2	3	0	3	2	3	1	1	2	2	1	2	3	0	0	0	0	0	0	0	0	0	0	0	0	0	0
19	1	1	0	2	3	2	1	2	2	2	3	2	3	2	2	3	1	2	2	3	1	1	1	1	0	1	0	1	0	2	0	1	0	1	1	0	1	0	0	0	0	0	0	0	0	1	0	0	0
18	1	0	0	2	3	2	2	1	3	2	3	2	2	2	2	2	0	1	1	0	2	1	3	1	0	1	0	0	0	1	0	1	0	1	1	0	0	0	0	0	0	0	0	0	0	0	0	0	0
18	1	1	0	3	2	3	3	3	1	1	1	2	2	1	3	2	0	1	2	0	1	2	2	1	1	1	0	0	0	1	0	1	0	0	1	1	2	0	0	0	0	0	0	0	0	0	0	0	0
19	1	0	0	2	3	2	2	0	2	2	3	2	2	1	2	2	0	1	1	0	1	2	2	2	1	1	2	3	2	0	1	1	2	2	2	1	1	0	0	0	0	0	0	0	0	0	0	0	0
19	1	0	0	2	3	0	1	2	2	3	3	1	2	1	2	2	0	2	3	3	3	2	2	1	2	2	2	3	0	2	0	1	2	2	2	1	2	0	0	0	0	0	0	0	0	0	0	1	1
19	1	0	0	3	3	3	3	3	2	1	1	3	1	1	1	2	0	2	2	0	3	1	3	1	1	2	0	1	0	1	1	1	0	1	2	1	1	0	0	0	0	0	0	0	0	1	1	0	0
18	1	1	0	1	2	2	2	1	2	1	2	1	2	2	2	2	0	1	1	2	2	2	2	1	1	1	2	1	1	2	0	1	1	1	1	1	1	0	0	0	0	0	0	0	0	1	1	0	0
19	1	0	0	1	2	3	2	1	1	3	3	2	2	2	3	2	0	1	1	2	2	2	3	1	2	0	0	1	2	1	1	1	0	1	1	1	1	0	0	0	0	0	0	0	0	0	0	0	0
20	1	0	0	2	3	2	3	3	3	3	3	3	3	3	3	3	0	1	2	1	0	1	2	2	1	1	2	1	1	1	0	1	0	2	1	1	0	0	0	0	0	0	0	0	0	0	0	0	0
19	1	0	0	2	3	3	3	2	2	2	3	2	2	2	2	3	0	0	0	1	0	1	2	1	1	2	0	0	0	1	0	2	0	1	1	0	4	0	0	0	0	0	0	0	0	0	0	0	0
18	1	1	0	1	2	2	2	2	1	1	2	2	2	1	2	2	2	1	1	1	0	1	1	1	1	1	0	1	0	1	1	1	1	1	1	0	1	0	0	0	0	0	0	0	0	0	0	0	0
19	1	1	0	0	2	3	3	2	3	2	2	2	3	2	3	3	0	1	2	1	1	2	3	0	1	2	0	0	0	1	0	1	0	1	1	1	1	0	0	0	0	0	0	0	0	0	0	0	0
19	1	1	0	3	1	2	1	1	2	2	1	2	1	2	1	2	1	2	3	1	3	3	3	1	1	1	1	1	2	1	1	1	2	1	2	1	1	0	0	0	0	0	0	0	0	0	0	0	0
18	1	0	0	2	3	2	2	1	2	2	3	1	3	3	2	3	0	3	2	2	3	3	3	2	0	1	1	2	0	2	1	1	2	3	2	0	0	0	0	0	0	0	0	2	1	1	1	1	3
19	1	1	0	2	2	3	3	3	2	2	2	2	0	0	3	0	0	0	0	0	2	2	2	1	1	0	2	0	1	1	0	1	0	1	1	1	1	0	0	0	0	0	0	0	0	0	0	0	0
19	1	0	0	3	3	3	2	3	3	3	3	3	3	3	3	1	0	0	0	1	2	0	3	1	0	1	0	0	0	0	0	0	0	1	1	0	1	0	0	0	0	0	0	0	0	0	0	0	0
19	1	1	0	1	3	2	2	2	2	2	2	2	2	2	2	2	1	1	1	1	1	0	1	1	0	1	0	1	1	1	0	1	0	0	1	0	0	0	0	0	0	0	0	0	0	0	0	0	0
20	1	0	0	3	1	3	3	3	2	3	1	2	3	2	3	3	0	1	2	2	1	1	3	1	1	0	0	0	0	1	0	1	0	0	1	0	0	0	0	1	1	0	0	0	0	1	1	0	0
18	1	1	0	1	2	3	1	1	3	3	3	3	2	1	2	2	0	0	0	0	0	0	1	1	1	1	0	1	0	1	0	2	0	1	1	0	1	0	0	0	0	0	0	0	0	0	0	0	0
19	1	1	0	3	0	1	1	0	2	2	0	2	2	3	3	3	3	1	1	0	3	1	1	2	0	2	1	2	0	2	2	2	1	3	3	1	0	2	2	0	0	0	0	0	0	1	1	1	2
22	3	0	0	2	2	2	2	2	2	2	2	2	2	2	2	2	2	2	2	2	2	2	2	1	0	1	0	1	0	0	0	2	1	2	0	0	0	0	0	0	0	0	0	1	1	1	1	2	2
21	3	0	0	1	3	2	2	2	3	3	3	3	3	2	3	2	0	0	1	1	2	1	2	1	1	1	0	1	2	2	1	1	1	1	1	0	0	0	0	0	0	0	0	0	0	0	0	1	1
21	3	0	0	3	0	3	3	3	2	2	1	1	1	2	3	3	0	2	0	0	2	0	2	1	1	1	0	0	0	0	1	1	0	1	1	0	1	0	0	0	0	0	0	0	0	0	0	0	0
21	3	0	0	2	2	2	2	2	2	2	2	2	2	2	2	3	0	0	0	1	2	2	2	1	1	1	0	0	0	0	0	0	0	0	1	0	0	0	0	0	0	0	0	0	0	0	0	0	0
21	3	0	0	1	1	1	1	1	1	1	1	2	1	2	1	2	0	1	3	0	1	3	0	1	1	1	1	1	2	2	0	0	1	1	2	0	1	0	0	0	0	0	0	0	0	0	0	0	0
22	3	1	0	2	3	2	3	1	2	3	3	3	2	2	2	2	0	1	0	1	0	1	3	1	1	1	0	1	0	2	2	1	0	1	0	0	0	0	0	3	0	0	0	0	0	0	0	0	0
20	3	1	6	2	2	2	2	2	2	2	2	2	2	2	2	2	2	2	2	2	2	2	2	1	1	1	1	1	1	1	0	0	1	1	1	0	0	0	0	0	0	0	0	0	0	0	0	0	0
20	3	0	2	2	1	2	1	1	1	2	1	2	2	1	3	1	0	1	1	1	1	0	3	1	1	2	0	0	0	2	0	2	0	3	1	1	0	0	0	0	0	0	0	0	0	0	0	0	0
23	4	1	2	2	3	2	3	3	2	3	3	3	3	3	3	2	0	3	3	1	3	2	3	2	1	0	0	1	1	0	2	0	1	0	1	0	0	0	0	0	0	0	0	0	0	0	0	0	0
21	3	0	2	2	1	2	2	2	3	2	3	2	2	3	2	3	0	0	2	1	2	1	0	1	1	2	1	0	2	0	0	1	0	1	1	0	1	0	0	0	0	0	0	0	0	0	0	0	0
21	3	1	2	1	1	1	1	1	1	1	1	1	1	1	1	1	1	1	1	1	1	1	1	1	1	1	0	0	0	0	0	1	0	1	1	1	0	0	0	0	0	0	0	0	0	0	0	0	0
19	1	1	2	3	1	2	2	1	2	2	1	1	2	1	2	2	0	1	0	0	0	1	3	1	1	2	0	1	1	1	1	1	0	2	1	1	2	0	0	0	0	0	0	0	0	0	0	0	0
19	2	0	2	0	0	0	0	0	0	0	0	0	0	0	0	0	0	0	0	0	0	0	0	3	0	3	1	3	3	0	3	3	0	3	3	1	0	1	4	0	0	1	3	4	1	1	4	0	0
21	3	1	2	2	2	2	2	2	2	2	2	2	2	2	2	2	2	2	2	2	2	2	2	3	0	3	0	3	2	1	3	2	2	2	2	1	1	0	0	0	0	0	0	0	0	0	0	0	0
21	3	1	2	1	1	1	1	1	1	1	1	1	1	1	1	1	1	1	1	1	1	1	1	2	0	3	1	2	3	0	2	1	2	1	2	1	2	0	0	0	0	0	0	0	0	0	0	0	0
21	3	1	2	1	2	3	3	3	2	2	2	2	2	2	3	3	0	1	2	1	1	2	3	1	1	0	0	0	0	1	1	3	0	1	1	1	0	0	0	0	0	0	0	0	0	0	0	0	0
19	1	1	2	2	2	2	2	2	2	2	2	2	2	2	2	2	2	2	2	2	2	2	2	1	1	1	1	2	1	2	1	2	2	2	1	1	1	0	0	0	0	0	0	0	0	0	0	0	0
21	3	1	2	2	2	2	2	2	2	1	1	1	2	3	2	2	0	0	0	0	0	0	0	0	3	0	0	0	0	2	0	1	0	0	1	0	1	0	0	0	0	0	0	0	0	0	0	0	0
22	3	1	2	3	3	2	2	2	2	2	2	2	2	2	2	2	2	0	0	0	0	0	2	1	1	2	0	1	0	1	2	1	1	2	1	1	0	0	0	0	0	0	0	0	0	0	0	0	0
23	3	1	2	2	3	0	1	0	1	0	1	2	2	0	0	3	3	2	2	1	3	2	3	2	2	2	1	2	1	2	1	3	1	3	2	0	2	1	2	0	0	0	0	0	0	0	0	1	1
22	3	1	2	2	2	1	2	2	2	2	2	2	2	2	2	2	1	1	0	0	1	1	2	1	2	1	2	1	1	1	1	2	0	1	1	1	1	0	0	0	0	0	0	0	0	0	0	0	0
19	1	0	3	2	2	3	2	1	2	3	1	3	2	2	2	1	0	0	0	0	1	0	1	1	1	1	1	0	1	2	1	1	1	0	1	0	1	0	0	0	0	0	0	0	0	0	0	0	0
20	2	0	3	1	2	1	1	3	2	2	1	1	3	0	1	0	3	0	0	3	3	2	2	2	1	3	0	2	1	2	0	3	2	2	2	2	3	2	0	0	0	0	0	0	0	2	0	1	0
18	1	0	3	1	3	3	3	2	2	2	3	3	3	1	2	3	0	3	0	0	3	3	3	1	1	1	0	1	0	0	0	0	0	1	0	0	0	0	0	1	1	0	0	0	0	0	0	1	1
19	1	0	3	1	1	2	2	1	2	2	1	1	1	1	1	1	0	1	0	2	2	0	2	1	2	1	0	1	1	1	0	1	0	0	0	1	0	0	0	0	0	0	0	0	0	0	0	0	0
21	1	0	3	1	2	2	3	2	2	2	2	2	2	2	2	3	0	1	1	1	1	0	1	1	0	0	0	1	1	1	3	1	0	0	0	0	0	0	0	0	0	0	0	0	0	0	0	0	0
19	1	0	3	1	2	2	2	1	1	2	3	2	2	1	2	3	0	2	1	1	2	1	3	1	1	1	0	0	1	2	3	1	1	1	1	0	1	0	0	0	0	0	0	0	0	0	0	0	0
18	1	0	3	1	2	2	2	3	2	2	2	2	2	1	2	2	0	1	2	1	1	2	2	1	1	1	0	0	1	1	0	2	0	1	1	1	1	0	0	0	0	0	0	0	0	0	0	0	0
20	1	0	3	2	3	3	3	2	3	3	2	3	3	2	2	3	0	2	1	2	1	1	2	1	1	2	0	0	0	1	0	1	0	2	1	0	0	0	0	0	0	0	0	0	0	0	0	0	0
19	1	0	3	1	3	3	1	2	2	2	3	2	1	2	3	1	0	2	0	1	1	1	0	1	1	1	0	1	1	2	0	1	0	1	1	0	0	0	0	0	0	0	0	0	0	0	0	0	0
20	1	0	3	2	2	2	3	2	2	2	3	2	2	1	2	3	0	1	1	1	0	0	1	1	1	1	0	0	1	1	0	1	1	1	1	1	0	0	0	0	0	0	0	0	0	0	0	0	0
18	1	1	3	2	2	2	3	1	2	1	1	2	2	1	1	2	0	1	1	1	2	1	2	1	1	1	1	3	1	2	1	1	2	2	2	0	0	0	0	0	0	0	0	0	0	0	0	0	0
20	1	0	3	2	2	2	2	2	2	2	2	2	2	2	2	2	2	2	2	2	2	2	2	1	2	2	0	0	1	2	0	1	1	1	1	1	2	0	0	0	0	0	0	0	0	0	0	0	0
20	1	0	3	2	3	3	3	2	2	2	3	1	3	2	2	2	2	1	2	1	2	3	2	1	1	2	0	1	0	1	0	1	0	2	1	0	0	0	0	0	0	0	0	0	0	0	0	0	0
19	1	0	3	1	3	1	1	0	3	3	3	2	0	3	3	3	3	3	1	0	3	2	3	1	2	1	0	1	0	1	2	2	0	2	1	3	2	1	0	0	0	0	0	0	0	0	0	1	1
20	1	1	3	2	2	2	2	2	1	2	2	2	2	1	2	3	1	2	1	1	2	0	3	1	1	2	0	1	1	2	0	1	0	1	1	0	1	0	0	0	0	0	0	0	0	0	0	0	0
18	1	0	3	2	2	2	2	2	2	1	1	2	2	1	2	2	0	2	1	1	2	2	2	1	1	1	1	2	1	1	1	2	1	1	1	0	1	0	0	0	0	0	0	0	0	0	0	0	0
18	1	1	3	2	1	2	1	2	2	1	1	0	1	0	2	0	2	0	0	0	3	0	2	2	2	2	3	1	1	0	2	1	2	2	2	1	1	1	2	0	0	0	0	0	0	2	1	2	3
19	1	0	3	1	1	1	1	0	3	3	1	3	1	0	3	2	3	0	2	0	2	2	1	2	2	1	1	2	2	0	2	1	1	3	2	2	0	0	0	0	0	0	0	0	0	0	0	0	0
18	1	0	3	2	3	2	2	2	2	2	2	2	2	2	2	2	0	1	1	1	1	1	2	1	1	0	0	1	1	1	2	1	1	1	1	1	0	1	2	0	0	0	0	0	0	0	0	1	1
20	1	0	3	3	3	3	3	1	2	1	3	2	2	0	3	0	0	0	0	0	0	0	2	0	0	0	0	2	0	0	0	2	0	1	0	0	0	0	0	0	0	0	0	0	0	0	0	0	0
19	1	0	3	1	2	2	3	1	2	1	2	1	3	1	2	2	0	1	1	2	2	0	2	1	1	2	1	1	1	1	1	1	0	1	1	0	1	0	0	0	0	0	0	0	0	0	0	1	0
18	1	0	3	1	3	2	1	0	3	1	3	3	3	1	3	0	3	0	3	3	3	1	3	1	1	0	1	1	0	2	1	1	0	2	1	1	3	2	2	0	0	0	0	1	0	0	0	0	0
18	2	0	3	2	2	3	3	2	2	1	2	2	2	2	2	2	0	2	2	2	2	2	2	1	1	2	0	1	1	1	1	2	0	2	1	1	0	0	0	1	0	0	0	0	0	1	0	0	0
20	2	0	3	2	3	2	2	3	1	2	1	2	2	2	2	1	0	2	2	1	0	2	2	1	1	1	0	0	0	1	1	1	0	1	1	0	0	2	0	0	0	0	0	0	0	0	0	0	0
19	1	0	3	1	1	2	2	1	1	2	2	1	1	1	2	1	0	1	1	1	0	1	2	1	1	2	0	0	0	1	0	1	1	0	1	0	1	0	0	0	0	0	0	0	0	0	0	0	0
19	1	0	3	1	2	2	2	0	1	2	2	2	2	2	2	2	2	2	2	2	2	2	2	0	2	1	0	1	1	0	1	2	2	0	0	3	3	0	0	0	0	0	0	0	0	0	0	0	0
18	1	0	3	3	3	3	3	3	3	3	2	2	1	1	2	2	1	0	1	0	2	1	1	0	1	0	0	0	0	1	0	1	0	0	1	0	0	0	0	0	0	0	0	0	0	0	0	0	0
19	1	0	3	3	2	3	3	1	2	2	1	2	2	3	2	1	0	0	0	0	0	0	1	1	1	1	0	1	0	0	0	1	0	1	1	0	0	0	0	0	0	0	0	0	0	0	0	0	0
20	1	0	3	3	3	3	3	3	3	3	3	2	1	3	1	2	0	0	0	1	2	2	3	1	1	2	1	2	1	2	2	1	1	2	2	1	0	0	0	0	0	0	0	0	0	0	0	0	0
19	1	0	3	2	3	3	2	2	1	2	2	2	2	2	2	2	0	0	1	0	1	0	1	1	1	0	0	0	0	1	0	1	0	1	1	0	0	0	0	0	0	0	0	0	0	0	0	0	0
19	1	0	3	3	3	3	2	1	2	2	2	2	2	3	3	1	0	1	1	1	2	1	3	1	1	1	0	1	0	0	0	1	0	1	1	0	0	0	0	0	0	0	0	0	0	0	0	0	0
18	1	0	3	2	3	2	2	3	0	2	3	2	2	2	2	1	0	1	0	0	0	1	3	1	1	1	0	0	0	0	1	2	0	1	1	0	0	0	0	0	0	0	0	0	0	0	0	0	0
18	1	0	3	2	2	2	2	2	2	2	2	2	2	2	2	2	0	0	1	1	1	1	1	1	1	1	0	1	1	0	2	1	1	1	1	0	1	0	0	0	0	0	0	0	0	0	0	0	0
19	1	0	3	2	2	2	2	2	2	2	2	2	2	2	2	2	2	1	1	1	1	1	2	1	1	0	0	0	0	1	0	0	0	0	0	0	0	0	0	0	0	0	0	0	0	0	0	0	0
18	1	0	3	1	1	2	1	1	1	1	1	1	2	2	1	1	0	1	1	1	1	0	1	1	1	1	1	0	0	2	0	1	0	1	1	0	1	0	0	0	0	0	0	0	0	0	0	0	0
19	1	0	3	2	2	2	2	2	2	2	2	2	2	2	2	2	2	2	2	2	2	2	2	1	1	1	0	1	0	1	1	1	1	1	1	1	3	0	0	0	0	0	0	0	0	0	0	0	0
20	1	0	3	2	3	2	3	3	3	3	3	3	3	2	3	3	1	1	3	2	3	0	3	1	0	1	0	1	0	0	0	1	0	1	1	0	0	0	0	0	0	0	0	0	0	0	0	0	0
18	1	0	3	2	2	3	2	1	2	1	2	2	2	2	2	2	0	0	0	1	0	0	1	1	1	2	0	0	0	0	0	1	0	1	1	1	1	0	0	0	0	0	0	0	0	0	0	0	0
19	1	0	3	2	3	2	2	1	2	2	3	2	2	1	1	1	0	1	0	1	1	1	1	1	1	1	1	1	1	1	0	2	1	1	1	0	1	0	0	0	0	0	0	0	0	0	0	0	0
19	1	0	3	3	3	3	3	3	2	3	2	2	2	2	3	3	0	0	0	1	0	0	2	1	1	2	0	1	2	1	0	1	1	1	1	0	0	2	1	2	1	0	0	1	1	1	1	2	2
19	1	0	3	2	3	0	1	1	1	1	3	2	2	2	1	2	2	2	2	2	2	2	2	2	1	3	1	3	2	2	0	3	2	3	3	2	3	0	0	0	0	0	0	0	0	0	0	0	0
19	1	0	3	3	3	3	3	2	3	3	3	3	3	3	3	3	0	3	3	2	3	3	3	1	0	2	0	1	0	0	1	2	0	2	1	0	0	0	0	0	0	0	0	0	0	0	0	0	0
19	1	0	3	2	3	2	3	2	2	3	3	3	3	2	3	2	0	1	2	1	1	1	2	1	1	1	0	0	0	1	1	1	0	1	1	0	2	0	0	0	0	0	0	0	0	0	0	0	0
19	2	1	3	3	2	3	3	2	3	3	3	2	2	3	3	3	0	2	3	2	1	2	3	1	1	2	0	1	0	1	1	1	0	1	1	1	0	0	0	0	0	0	0	0	0	0	0	0	0
22	3	1	3	2	2	3	3	1	3	3	2	2	3	1	1	2	3	2	2	1	2	3	3	1	1	2	1	3	1	1	0	2	2	1	1	2	0	0	0	0	0	0	0	0	0	0	0	0	0
21	3	0	3	0	0	0	0	0	0	0	0	0	0	0	0	0	0	0	0	0	0	0	0	0	3	0	3	0	0	3	0	0	3	0	0	3	3	0	0	0	0	0	0	0	0	0	0	0	0
22	2	0	3	3	0	1	2	3	0	0	2	2	1	1	0	3	3	2	2	0	3	2	1	2	3	1	3	3	2	2	3	3	1	3	3	1	1	0	0	2	3	0	0	0	0	1	3	0	0
21	3	0	1	2	3	1	1	2	3	2	2	2	2	2	2	2	2	2	2	2	2	2	2	1	0	0	0	0	0	0	0	1	0	1	1	0	0	2	0	0	0	0	0	0	0	0	0	2	0
21	4	1	1	2	2	2	2	1	1	1	2	2	2	2	2	2	0	1	2	1	2	3	3	1	1	3	0	1	0	0	1	1	1	2	1	2	0	0	0	0	0	0	0	0	0	2	2	0	0
18	1	0	3	2	2	1	2	2	2	1	2	2	2	1	2	2	1	2	2	1	2	2	2	1	2	1	0	1	0	2	0	3	0	1	1	0	0	0	0	0	0	0	0	0	0	0	0	0	0
20	2	0	3	2	2	2	2	2	2	3	2	2	2	3	2	3	0	1	0	1	2	0	1	1	1	1	1	0	0	1	1	1	0	1	1	0	0	0	0	0	0	0	0	0	0	0	0	0	0
18	1	0	3	3	3	3	3	3	3	3	3	3	3	3	3	3	3	3	3	3	3	3	3	3	0	3	0	3	3	0	1	2	2	0	0	3	0	0	0	0	0	0	0	0	0	1	0	0	0
20	2	0	3	1	1	1	1	1	1	1	1	1	1	1	1	1	1	1	1	1	1	1	1	0	3	0	3	0	0	3	0	0	3	0	0	3	3	0	0	0	0	0	0	0	0	0	0	0	0
21	2	0	3	1	1	1	1	1	1	1	1	1	1	1	1	1	1	1	1	1	1	1	1	0	0	0	0	0	0	0	0	0	0	0	0	0	1	0	0	0	0	0	0	0	0	0	0	0	0
19	1	0	3	2	2	2	2	2	2	2	2	2	2	2	2	2	2	2	2	2	2	2	2	1	1	1	1	1	0	1	1	1	1	1	1	0	2	0	0	0	0	0	0	0	0	0	0	0	0
19	1	0	3	1	3	3	3	3	3	2	2	2	2	3	3	2	0	1	1	1	1	1	3	1	1	1	0	0	0	1	2	1	0	1	1	0	0	0	0	0	0	0	0	0	0	0	0	0	0
18	1	0	3	1	3	3	3	3	3	3	3	2	2	2	3	2	0	0	0	1	1	1	3	1	1	1	0	1	1	0	1	2	0	0	1	0	0	0	0	0	0	0	0	0	0	0	0	0	0
19	1	0	3	2	2	3	3	1	1	3	2	2	2	2	3	3	0	1	0	1	1	2	3	0	0	0	0	0	0	0	1	0	0	0	0	0	0	0	0	0	0	0	0	0	0	0	0	0	0
20	3	0	3	2	2	2	2	0	2	2	2	2	1	2	2	2	1	1	0	0	2	1	2	2	1	3	0	1	1	2	0	1	0	2	2	1	0	0	0	0	0	0	0	0	0	0	0	0	0
21	3	0	3	3	3	3	3	1	3	2	3	3	3	3	3	3	0	0	0	0	0	0	3	0	0	0	0	0	0	0	2	1	0	1	1	1	2	0	0	0	0	0	0	1	1	0	0	2	1
20	3	0	3	3	3	3	3	3	3	3	3	2	2	2	3	2	0	0	0	1	1	1	1	1	1	1	0	1	1	1	1	1	0	1	1	1	1	0	0	0	0	0	0	0	0	0	0	0	0
19	3	0	3	1	1	3	1	2	1	1	3	2	2	0	3	2	0	1	2	1	1	2	3	1	2	0	0	0	0	1	1	2	0	1	1	1	3	0	0	0	0	0	0	0	0	0	0	0	0
20	3	1	3	1	2	2	2	2	2	1	2	2	2	1	2	2	3	2	2	1	1	1	2	1	1	0	0	1	1	2	1	0	0	1	1	1	3	0	0	0	0	0	0	0	0	0	0	0	0
20	3	0	3	1	1	2	1	3	2	1	1	1	1	0	1	3	0	0	1	0	1	2	3	1	1	2	0	1	0	2	2	1	0	1	1	1	0	0	0	0	0	0	0	0	0	0	0	0	0
18	1	0	3	2	2	2	2	2	2	2	2	2	2	2	2	2	2	2	2	2	2	2	2	1	2	1	2	1	2	1	1	1	2	1	1	0	1	0	0	0	0	0	0	0	0	0	0	0	0
17	3	0	3	2	2	2	2	2	2	2	2	2	2	2	2	2	2	2	2	2	2	2	2	1	2	1	2	1	1	2	1	1	2	1	1	2	2	0	0	0	0	0	0	0	0	0	0	0	0
21	3	0	3	1	3	3	1	1	1	1	3	3	3	1	0	1	0	0	0	1	3	3	3	3	0	1	0	2	1	2	0	1	1	1	1	0	0	0	0	0	0	0	0	0	0	0	0	0	0
21	3	0	3	2	2	2	2	1	1	1	1	1	2	1	2	1	1	2	2	2	1	2	1	1	1	2	0	1	0	2	0	1	0	1	1	2	1	0	0	0	0	0	0	0	0	0	0	0	0
18	3	0	3	1	3	2	1	2	2	3	3	1	2	3	3	1	1	1	1	0	1	1	2	1	0	1	0	0	0	2	0	1	0	1	0	0	0	0	0	0	0	0	0	0	0	0	0	0	0
19	3	0	3	2	3	3	3	1	1	2	3	2	2	1	3	1	0	1	0	2	1	0	3	1	1	0	0	0	0	1	0	1	1	0	1	0	0	0	0	0	0	0	0	0	0	0	0	1	0
21	3	1	3	2	2	2	2	1	1	3	1	2	2	2	2	3	1	1	0	0	2	1	1	1	1	2	0	1	1	1	0	2	1	1	1	2	1	0	0	0	0	0	0	0	0	0	0	0	0
20	3	0	3	1	2	2	2	2	1	2	2	1	2	2	2	1	0	1	1	1	1	0	1	0	0	0	0	0	0	1	0	0	0	0	0	0	0	0	0	0	0	0	0	0	0	0	0	0	0
20	3	0	3	1	2	1	1	1	2	1	2	1	1	1	1	1	0	1	1	1	0	1	1	1	1	1	1	0	0	1	0	0	0	0	1	0	1	0	0	0	0	0	0	0	0	0	0	0	0
22	3	0	3	1	2	2	2	2	2	2	2	2	2	2	2	2	1	1	1	1	1	1	1	1	1	1	0	1	1	1	0	1	1	1	1	1	1	0	0	0	0	0	0	0	0	0	0	0	0
22	3	0	3	2	2	2	2	2	2	2	2	2	2	2	2	2	0	2	2	2	2	2	2	1	1	2	1	1	1	1	1	0	0	0	1	0	1	0	0	0	0	0	0	0	0	0	0	0	0
19	3	0	3	2	2	3	3	3	3	3	2	1	2	3	3	3	0	3	3	1	2	3	3	1	0	1	0	1	0	1	1	1	0	1	0	0	1	1	1	0	0	0	0	0	0	0	0	0	0
19	3	0	3	1	1	2	2	1	2	1	2	2	2	1	2	2	2	1	1	1	1	2	2	1	2	0	2	1	1	2	1	1	1	1	1	0	1	0	0	0	0	0	0	0	0	0	0	0	0
22	3	1	3	2	3	3	2	1	1	1	3	2	2	2	0	3	0	1	0	2	1	0	1	1	0	1	0	0	0	1	2	1	0	1	1	1	0	0	0	0	0	0	0	0	0	0	0	0	0
21	3	0	3	2	1	1	2	1	1	0	1	1	1	1	1	1	0	1	1	2	1	2	2	1	1	1	0	1	1	0	1	1	1	2	0	0	0	0	0	0	0	0	0	0	0	0	0	0	0
19	3	0	3	2	3	2	2	1	2	2	3	1	2	1	2	1	0	1	1	1	2	1	2	1	0	1	0	1	1	1	0	0	0	1	1	1	2	0	0	0	0	0	0	0	0	0	0	0	0
18	4	0	1	2	1	2	2	1	2	2	1	1	3	2	1	1	2	2	1	2	2	1	2	1	1	2	1	1	1	0	2	0	1	0	1	0	1	0	0	0	0	0	0	0	0	0	0	0	0
20	1	0	0	3	2	3	3	2	3	3	3	3	3	3	2	2	0	1	1	1	1	0	3	1	1	1	1	1	0	2	1	1	0	1	1	1	1	0	0	1	1	0	0	1	3	1	3	0	0
19	1	1	0	2	3	3	3	3	2	3	3	3	3	2	3	2	0	1	0	0	1	0	3	1	0	0	0	0	0	1	0	1	0	1	1	0	0	0	0	0	0	0	0	0	0	1	1	1	1
19	1	1	0	1	3	2	2	1	2	2	3	2	3	1	2	1	0	0	0	1	2	0	3	2	0	1	0	1	1	1	1	0	1	1	1	0	0	0	0	0	0	0	0	0	0	0	0	0	0
19	1	1	0	2	2	1	1	1	1	1	1	2	2	1	1	1	0	0	0	0	0	0	1	1	0	0	0	0	0	1	1	1	1	1	0	0	0	0	0	0	0	0	0	0	0	0	0	0	0
19	1	0	0	3	3	2	2	3	2	2	3	3	2	2	3	3	0	0	0	1	2	3	3	1	1	2	0	1	0	1	2	1	0	1	1	0	0	2	2	2	1	0	0	1	1	1	2	1	2
18	1	0	0	3	3	3	3	1	1	2	2	3	3	2	3	3	0	0	0	0	0	2	3	1	1	1	0	1	0	0	0	1	0	0	0	1	0	0	0	0	0	0	0	0	0	0	0	0	0
19	1	0	0	2	2	3	2	3	1	2	2	2	2	3	2	2	0	1	1	1	1	3	1	1	0	2	0	2	1	2	0	1	1	1	2	3	1	0	0	0	0	0	0	0	0	1	1	1	1
19	1	1	0	3	3	3	3	3	2	2	2	2	2	2	1	2	0	0	0	0	0	1	0	1	1	0	0	1	0	0	0	0	0	0	0	0	1	0	0	0	0	0	0	0	0	0	0	0	0
19	1	0	0	1	1	3	3	3	2	2	1	2	0	2	2	3	2	2	2	1	1	1	2	1	1	2	2	1	1	1	0	1	1	1	1	1	2	0	0	0	0	0	0	2	2	1	2	1	2
19	1	0	0	2	3	1	1	1	1	0	3	3	1	0	3	3	0	2	2	1	2	0	1	1	1	0	1	1	0	0	2	2	1	1	1	1	1	0	0	0	0	0	0	0	0	0	0	0	0
19	1	0	0	1	3	3	3	3	2	3	2	2	2	2	2	2	0	1	1	1	0	2	1	1	1	0	0	0	0	0	1	1	0	1	1	1	0	0	0	0	0	0	0	0	0	0	0	0	0
19	1	0	0	2	2	1	1	1	2	2	2	1	2	2	2	2	1	1	1	1	1	1	2	1	2	0	0	1	1	0	0	0	1	1	1	0	0	0	0	0	0	0	0	0	0	0	0	0	0
19	1	1	0	1	2	2	2	2	1	1	1	1	2	1	2	2	0	1	1	1	1	1	1	1	1	1	0	1	1	1	1	1	1	1	1	1	1	0	0	0	0	0	0	0	0	0	0	0	0
18	1	0	0	1	3	2	2	1	3	3	2	2	2	2	2	2	0	0	1	1	1	0	1	1	1	1	0	0	0	1	1	1	0	0	0	0	0	0	0	0	0	0	0	0	0	0	0	0	0
18	1	0	0	1	1	1	1	1	2	2	2	2	2	1	1	1	0	1	3	2	1	3	1	1	1	2	2	1	1	1	2	1	2	2	1	0	0	0	0	0	0	0	0	1	1	0	0	0	0
19	1	1	0	2	1	3	3	2	2	2	1	1	1	0	1	2	0	0	1	0	1	0	2	1	2	1	0	0	0	1	1	1	0	1	1	0	1	0	0	0	0	0	0	0	0	0	0	0	0
18	1	1	0	3	3	3	3	3	3	3	3	3	3	3	3	3	0	2	3	1	2	0	3	0	0	0	0	1	1	0	2	1	0	1	1	0	0	0	0	1	1	0	0	0	0	0	0	0	0
19	1	1	0	3	1	3	3	3	2	3	2	2	2	3	2	2	3	0	0	0	0	0	1	2	0	0	0	3	1	2	0	1	0	2	1	0	0	0	0	0	0	0	0	0	0	0	0	0	0
19	1	0	0	1	1	1	1	1	1	1	1	2	2	1	2	2	2	2	2	2	2	2	2	1	1	2	2	1	1	1	3	3	2	3	1	0	1	1	1	0	0	0	0	2	2	1	2	2	2
18	1	0	0	2	1	2	3	3	3	2	1	3	1	1	2	2	0	0	1	0	0	1	1	0	1	0	0	1	0	0	0	1	0	1	1	0	0	0	0	0	0	0	0	0	0	0	0	1	0
18	1	0	0	2	2	2	3	1	2	2	1	2	1	1	2	1	0	1	2	1	1	1	2	1	1	1	0	1	0	1	0	2	1	1	0	0	1	0	0	0	0	0	0	0	0	0	0	0	0
19	1	0	0	3	0	0	0	0	3	3	2	1	1	0	2	3	0	1	3	2	3	2	1	2	3	1	0	1	1	2	2	0	2	2	2	1	2	0	0	2	0	0	0	3	4	3	3	0	0
18	1	0	0	3	3	3	3	3	2	2	3	3	3	3	2	1	0	0	0	1	2	0	3	1	0	0	1	0	0	1	0	1	0	0	1	0	0	0	0	0	0	0	0	0	0	0	0	0	0
19	1	0	0	2	3	2	1	1	2	2	2	2	2	2	2	2	2	3	1	1	2	1	1	1	1	2	0	1	1	1	1	2	1	1	2	1	1	0	0	0	0	0	0	0	0	0	0	0	0
18	1	1	0	3	3	3	2	1	2	2	3	3	2	2	1	2	2	1	1	2	2	3	3	1	1	2	0	1	0	1	1	1	0	1	0	0	1	0	0	0	0	0	0	0	0	0	0	0	0
19	1	0	0	3	3	3	3	3	1	1	3	1	3	2	0	2	0	0	2	1	1	0	3	1	1	0	0	1	0	0	0	1	0	0	1	0	0	0	0	0	0	0	0	0	0	0	0	0	0
18	1	0	0	2	3	2	1	0	2	3	3	3	1	2	1	0	0	0	0	1	0	0	0	1	0	0	0	1	0	0	0	0	1	1	1	0	0	0	0	0	0	0	0	0	0	0	0	0	0
19	1	0	0	3	3	2	3	3	2	2	3	2	2	2	2	3	1	1	0	0	1	0	2	1	1	0	0	1	0	1	1	0	1	1	1	1	0	0	0	0	0	0	0	0	0	0	0	0	0
18	1	0	0	3	3	1	3	2	2	3	3	2	2	2	0	3	0	2	2	2	2	1	2	2	0	2	0	2	1	1	2	0	1	3	1	1	0	0	0	2	2	0	0	1	1	2	3	0	0
18	1	0	0	1	2	1	2	1	1	2	1	1	1	2	2	2	1	1	1	2	2	1	1	3	1	2	2	3	0	2	3	1	1	2	3	3	2	1	1	2	2	2	2	2	2	2	2	2	2
19	1	1	0	3	3	3	3	1	3	3	2	3	1	3	2	3	0	0	0	1	0	3	3	3	0	0	0	1	0	2	0	2	0	3	1	0	0	0	0	0	0	0	0	0	0	0	0	0	0
18	1	0	0	2	3	2	2	3	1	1	1	1	1	1	1	1	1	1	1	1	1	1	1	1	1	1	1	1	1	1	0	1	1	1	1	0	0	0	0	0	0	0	0	0	0	0	0	0	0
19	1	0	0	2	2	3	1	1	1	2	1	2	3	3	1	0	0	0	2	0	1	2	1	1	1	2	0	1	1	1	2	3	1	2	1	1	9	0	0	0	0	0	0	1	0	1	1	0	0
19	1	0	0	3	3	3	3	3	3	3	3	3	3	3	3	2	0	1	1	2	1	1	1	1	1	1	0	0	0	1	0	1	0	1	1	0	0	0	0	0	0	0	0	0	0	0	0	0	0
19	1	0	0	3	3	3	3	2	2	2	2	2	2	2	2	2	1	1	0	1	1	0	1	2	2	2	0	2	2	1	2	1	1	1	1	0	0	0	0	0	0	0	0	1	1	0	0	0	0
18	1	1	0	2	3	3	3	2	2	2	2	2	1	1	2	2	0	1	1	1	1	1	1	1	1	0	0	0	0	1	1	1	0	1	1	1	0	0	0	0	0	0	0	0	0	0	0	1	0
19	1	1	0	0	3	2	2	2	2	2	3	2	2	1	1	2	0	1	1	1	1	1	1	2	1	2	1	2	2	1	2	2	1	2	2	2	1	0	0	0	0	0	0	0	0	0	0	0	0
20	1	0	0	2	3	3	3	3	1	2	2	2	2	3	3	3	3	0	0	2	3	3	3	1	1	2	0	1	0	1	0	2	1	2	1	0	1	0	0	0	0	0	0	1	1	1	1	0	0
19	1	0	0	2	2	2	3	2	1	1	2	2	2	2	2	2	0	0	0	0	0	0	1	1	1	0	1	1	1	1	0	1	1	0	1	0	3	0	0	0	0	0	0	0	0	0	0	0	0
19	1	0	0	3	2	2	2	3	1	3	3	2	1	2	1	3	1	2	2	2	1	1	2	1	1	1	0	1	0	1	1	1	0	2	1	0	1	0	0	0	0	0	0	0	0	0	0	0	0
18	1	0	0	3	1	2	2	2	2	2	1	2	2	2	2	2	0	0	2	1	1	2	1	1	1	1	0	1	1	1	0	1	1	3	1	1	1	0	0	0	0	0	0	0	0	1	0	2	1
18	1	0	0	2	2	2	1	2	2	1	1	1	1	2	2	2	1	1	1	1	1	2	1	1	1	2	1	1	1	2	2	1	2	1	1	1	1	0	0	0	0	0	0	0	0	1	1	0	0
19	1	1	0	2	1	2	2	1	2	2	3	2	3	1	3	2	0	1	2	1	1	1	2	1	1	0	0	1	0	1	1	1	0	1	1	1	1	1	0	0	0	0	0	0	0	1	0	0	0
18	1	0	0	1	2	1	1	2	1	1	1	1	1	1	1	1	0	1	1	1	1	1	1	1	2	1	1	1	1	1	1	1	1	1	2	0	1	0	0	0	0	0	0	0	0	0	0	0	0
19	1	0	0	1	3	3	3	3	2	2	2	2	1	2	2	1	0	1	1	2	1	0	1	1	1	0	0	0	1	1	0	0	0	0	1	0	1	0	0	0	0	0	0	0	0	0	0	0	0
19	1	0	0	3	2	3	3	3	1	2	2	2	2	3	2	3	0	1	1	1	1	0	1	0	0	0	0	0	0	0	0	1	0	0	1	0	0	0	0	0	0	0	0	0	0	1	1	0	0
18	1	0	0	2	1	3	3	1	2	3	1	3	2	2	2	3	0	0	1	1	0	1	2	1	1	2	0	0	0	2	1	1	0	1	1	1	0	0	0	0	0	0	0	0	0	0	0	0	0
19	1	1	0	1	1	2	2	2	2	2	0	2	1	2	3	3	2	1	3	1	2	1	2	1	2	3	0	2	0	1	0	1	0	2	1	0	1	3	1	3	2	0	0	2	2	3	2	2	2
21	1	1	0	1	3	2	3	2	2	2	3	2	1	0	1	2	0	1	0	1	1	1	2	1	1	0	1	0	1	0	2	1	0	1	1	0	0	0	0	0	0	0	0	0	0	0	0	0	0
18	1	0	0	1	3	3	2	0	1	1	2	1	2	0	3	0	1	2	2	3	3	3	2	1	2	0	0	1	0	0	0	0	0	1	0	0	1	0	0	0	0	0	0	0	0	0	0	0	0
19	1	0	0	2	3	2	3	3	1	1	3	2	2	3	3	3	0	1	1	2	0	0	1	0	0	0	0	0	0	0	0	1	0	1	0	0	0	0	0	0	0	0	0	0	0	0	0	0	0
18	1	1	0	2	0	1	0	0	1	1	0	1	1	1	3	3	0	3	3	0	3	0	0	1	1	2	2	1	1	2	0	1	2	2	1	2	2	0	0	2	2	0	0	0	0	0	0	0	0
19	1	0	0	0	1	2	1	2	0	2	1	2	1	2	3	0	2	1	2	1	3	1	2	1	1	2	0	3	3	1	2	3	0	2	1	0	0	0	0	0	0	0	0	0	0	0	0	0	0
18	1	0	0	3	2	3	3	2	1	3	2	2	2	2	3	1	1	3	3	1	1	3	3	1	0	1	0	1	0	1	0	1	0	1	1	1	0	0	0	0	0	0	0	0	0	0	0	0	0
18	1	0	0	3	3	3	3	3	3	2	3	3	3	3	2	2	0	1	1	1	1	1	1	2	1	2	0	2	1	1	0	2	1	2	1	1	2	0	0	0	0	0	0	0	0	0	0	0	0
19	1	0	0	3	3	3	3	3	2	3	3	3	3	3	3	2	0	1	0	0	1	1	1	1	0	0	0	0	0	0	1	0	0	1	0	0	0	0	0	0	0	0	0	0	0	0	0	0	0
19	1	0	0	2	3	3	3	3	3	3	3	3	3	3	3	3	0	0	2	1	2	3	3	0	0	1	0	0	0	0	0	1	0	1	0	0	0	0	0	0	0	0	0	0	0	0	0	0	0
19	1	0	0	2	3	2	2	2	1	2	2	2	2	3	2	2	1	2	1	1	2	2	2	0	1	0	0	0	1	0	1	0	3	2	1	0	0	0	0	0	0	0	0	0	0	0	0	0	0
18	1	0	0	1	2	2	1	2	1	1	2	2	2	1	2	1	0	1	2	2	2	2	2	1	1	2	1	1	2	1	2	1	1	2	1	0	1	0	0	1	0	0	0	1	1	1	1	0	0
18	1	1	0	2	1	1	1	1	3	2	2	2	2	2	1	3	0	0	1	0	0	1	2	1	1	1	1	0	0	2	1	1	0	0	1	1	0	0	0	0	0	0	0	0	0	0	0	0	0
18	1	0	0	1	3	3	3	3	1	3	3	2	2	3	1	2	0	1	1	1	2	0	2	0	0	0	0	0	0	0	0	0	0	0	0	0	0	0	0	0	0	0	0	0	0	0	0	0	0
18	1	0	0	3	2	2	2	1	2	2	2	1	2	3	3	3	0	1	2	1	2	1	2	1	1	1	2	2	1	2	2	1	1	1	1	0	0	0	0	2	2	0	0	1	1	0	0	0	0
19	1	1	0	3	2	2	1	2	2	2	3	3	2	1	2	2	0	1	0	2	2	2	2	1	1	1	0	0	0	1	2	1	1	1	1	1	1	0	0	0	0	0	0	0	0	0	0	0	0
19	1	0	0	1	2	3	3	3	2	2	2	2	2	2	2	2	0	1	1	1	2	0	1	1	1	1	0	1	0	1	0	0	0	1	1	0	0	0	0	0	0	0	0	0	0	0	0	0	0
19	1	0	0	1	3	2	2	1	1	2	1	1	2	0	0	3	0	0	2	1	2	1	2	1	0	1	0	2	0	2	2	1	0	0	0	2	0	0	0	0	0	0	0	0	0	0	0	0	0
19	1	0	0	0	0	0	0	0	2	1	0	1	1	3	1	0	3	0	0	0	0	3	0	2	1	2	2	3	2	2	1	1	3	3	3	1	1	0	0	2	1	0	0	2	1	2	2	0	0
19	1	0	0	3	3	2	2	1	2	2	3	1	1	2	2	2	0	1	1	1	1	1	1	1	0	1	0	1	0	1	0	1	0	1	1	0	1	0	0	0	0	0	0	0	0	0	0	0	0
18	1	0	0	1	3	3	3	2	2	3	3	3	3	3	2	3	1	1	1	1	3	1	2	1	1	1	0	0	0	1	0	1	0	1	1	0	0	0	0	0	0	0	0	0	0	0	0	0	0
19	1	0	0	3	3	3	3	3	2	2	2	3	3	2	2	3	1	1	3	2	2	2	2	2	1	1	0	2	1	1	1	1	1	2	2	0	1	1	1	1	1	0	0	1	1	0	0	1	1
19	1	1	0	0	1	1	1	1	3	3	3	3	3	1	1	1	0	0	1	1	1	0	1	3	1	2	1	2	2	2	3	2	2	1	2	2	2	1	1	1	1	0	0	2	1	3	4	1	0
19	1	0	0	3	1	1	1	2	1	1	1	1	1	3	2	2	0	1	2	2	1	1	1	2	0	1	2	1	0	1	3	1	1	1	1	0	3	0	0	3	2	0	0	3	2	0	0	0	0
19	1	1	0	2	2	3	3	3	1	2	2	2	3	2	3	1	0	0	0	0	1	0	1	1	1	1	0	0	0	1	0	1	0	1	0	0	0	0	0	1	0	0	0	0	0	0	0	1	1
18	1	1	7	2	2	2	2	1	2	1	3	2	2	0	1	2	0	2	0	2	2	0	1	1	1	1	1	0	0	1	0	1	1	1	1	0	1	0	0	0	0	0	0	0	0	0	0	0	0
19	1	0	7	1	3	1	1	1	1	1	1	2	2	1	2	0	0	1	2	0	0	1	2	1	1	0	0	0	1	0	1	1	0	0	1	0	0	0	0	0	0	0	0	0	0	0	0	0	0
19	1	1	7	3	1	1	2	1	3	2	1	2	2	1	1	1	0	1	1	1	0	0	1	2	1	2	2	3	1	1	1	1	1	3	2	1	1	0	0	0	0	0	0	0	0	1	1	0	0
19	1	0	7	2	1	2	1	1	1	0	0	1	2	3	1	2	0	0	1	1	1	1	2	1	0	1	0	1	0	1	1	1	0	1	1	0	2	0	0	0	0	0	0	0	0	0	0	0	0
20	1	0	7	1	2	2	2	2	2	2	2	2	2	2	2	2	2	2	2	2	2	2	2	1	1	2	2	1	1	1	0	1	1	1	1	1	0	0	0	0	0	0	0	0	0	1	0	0	0
21	1	0	7	2	1	2	3	3	3	3	3	3	3	3	3	2	0	1	1	1	1	1	1	1	1	2	0	1	1	2	1	1	1	2	1	2	1	0	0	3	3	0	0	0	0	1	1	0	0
19	1	0	7	3	3	3	3	3	2	3	3	3	3	3	3	3	0	0	0	0	0	0	1	1	1	1	0	0	0	0	0	1	0	1	1	1	0	0	0	0	0	0	0	0	0	0	0	0	0
19	1	0	7	3	3	3	3	3	3	3	1	3	3	3	3	1	0	0	0	0	0	0	2	0	0	1	0	0	0	1	1	0	0	0	1	0	0	0	0	0	0	0	0	0	0	0	0	0	0
19	1	1	7	3	1	3	3	3	2	2	0	1	2	2	2	2	0	1	1	2	1	2	2	1	1	2	0	1	2	2	2	1	0	2	1	1	1	0	0	0	0	0	0	0	0	0	0	0	0
19	1	1	7	3	2	3	3	3	1	2	2	3	2	3	2	3	0	0	2	2	0	1	3	1	1	2	0	2	0	1	2	1	0	2	2	0	0	0	0	0	0	0	0	0	0	0	0	0	0
18	1	0	7	3	3	3	3	3	2	3	2	3	2	2	2	1	0	0	0	1	1	1	1	1	1	1	0	1	0	0	0	1	0	1	1	0	0	0	0	0	0	0	0	0	0	0	0	0	0
19	1	0	7	3	3	3	3	3	2	3	3	2	3	1	2	2	1	1	2	1	1	3	3	1	1	1	0	1	0	1	1	1	0	3	1	0	0	0	0	0	0	0	0	0	0	0	0	0	0
18	1	0	7	2	1	1	2	2	3	2	1	1	1	2	2	2	0	0	2	0	0	0	1	1	2	0	2	1	1	0	0	1	0	1	1	0	0	0	0	0	0	0	0	0	0	0	0	0	0
22	1	1	7	1	0	3	3	2	3	2	2	3	3	2	2	3	0	2	1	1	1	2	3	2	0	1	0	1	1	2	0	1	1	1	0	0	1	0	0	1	1	0	0	0	0	2	2	0	0
20	1	0	7	2	0	3	3	3	1	2	0	3	2	1	3	3	1	3	3	1	3	3	3	1	1	2	0	3	0	0	2	1	0	3	1	0	1	0	0	0	0	0	0	0	0	0	0	0	0
19	1	0	7	2	1	1	1	1	2	1	0	1	1	1	1	2	0	1	2	1	1	1	2	1	1	1	1	0	0	1	0	1	0	2	2	0	1	0	0	0	0	0	0	0	0	0	0	0	0
19	1	0	7	1	2	3	0	2	2	2	2	1	2	1	1	3	0	2	2	1	1	2	2	1	1	1	1	1	1	1	2	2	1	1	1	0	1	0	0	0	0	0	0	0	0	1	1	0	0
20	1	1	7	2	3	2	2	2	2	3	2	2	2	1	1	0	0	0	0	1	2	2	2	1	1	2	2	1	1	1	0	1	0	2	1	1	1	0	0	0	0	0	0	0	0	0	0	0	0
20	1	1	7	2	1	3	2	3	1	2	1	1	0	0	3	3	0	0	1	0	1	1	3	1	1	2	0	0	0	1	0	1	1	1	0	0	0	0	0	0	0	0	0	0	0	0	0	0	0
20	1	0	7	1	2	2	2	2	2	2	2	2	2	2	2	2	0	2	2	2	2	2	2	1	3	0	1	1	1	2	3	0	2	2	1	1	1	0	0	0	0	0	0	0	0	1	1	0	0
18	1	0	7	2	3	3	3	3	2	2	2	3	2	2	3	2	0	1	2	1	2	1	2	1	1	1	0	0	0	0	0	1	0	1	1	0	0	0	0	0	0	0	0	0	0	0	0	0	0
17	1	0	7	2	1	3	3	0	2	3	2	2	2	2	3	3	3	3	2	0	0	2	2	2	0	2	0	2	1	0	0	1	1	1	2	0	0	0	0	0	0	0	0	0	0	0	0	0	0
19	1	1	7	1	2	3	2	2	3	3	2	2	1	1	1	2	0	2	1	1	3	0	1	1	1	1	0	1	1	1	2	1	0	1	2	1	0	0	0	0	0	0	0	0	0	0	0	0	0
19	1	0	7	1	3	2	2	2	1	1	2	2	2	2	2	2	0	1	1	2	2	1	2	1	1	1	0	0	0	1	1	1	0	1	1	0	3	0	0	0	0	0	0	0	0	0	0	0	0
18	1	0	7	0	2	3	3	2	2	1	1	1	2	2	3	2	0	1	1	1	1	2	1	1	0	1	0	0	0	1	1	1	0	1	1	0	1	0	0	0	0	0	0	0	0	0	0	0	0
19	1	1	7	2	3	2	1	1	1	2	2	1	1	1	2	2	0	1	1	1	0	2	2	1	0	1	1	1	1	1	3	2	0	2	1	0	0	0	0	0	0	0	0	0	0	0	0	0	0
19	1	0	7	0	2	1	2	3	1	2	0	2	1	2	1	3	1	2	2	1	2	1	3	1	0	3	1	1	2	2	1	2	1	1	2	0	1	0	0	0	0	0	0	0	0	0	0	0	0
20	1	0	7	1	1	2	2	3	0	1	0	1	1	1	2	1	0	0	0	0	1	1	0	1	1	2	0	0	1	1	1	1	0	3	1	0	3	0	0	0	0	0	0	0	0	0	0	0	0
19	1	0	7	3	3	1	1	1	2	2	1	1	1	2	1	3	0	1	0	0	1	0	0	1	1	1	0	0	0	0	0	2	0	1	1	0	1	0	0	0	0	0	0	0	0	0	0	0	0
19	1	0	7	2	3	3	3	3	1	2	3	2	2	2	1	1	0	0	0	0	1	0	1	1	2	1	0	0	0	0	0	1	0	1	1	0	1	0	0	0	0	0	0	0	0	0	0	0	0
18	1	1	7	2	2	3	1	2	0	2	3	1	1	1	1	2	0	0	0	0	0	0	1	1	2	2	0	0	1	1	0	1	0	1	0	0	0	0	0	0	0	0	0	0	0	1	1	0	0
19	1	0	7	2	1	1	2	2	1	2	1	2	2	2	2	2	0	1	1	0	1	2	2	1	1	0	0	0	0	1	1	2	1	1	1	1	3	0	0	0	0	0	0	0	0	0	0	0	0
19	1	0	7	1	3	2	2	2	2	2	3	2	1	3	1	1	0	1	1	1	1	0	2	1	0	2	1	1	0	1	0	1	1	1	1	1	1	0	0	0	0	0	0	0	0	0	0	0	0
18	1	1	7	2	2	2	1	3	1	2	2	1	2	1	1	2	1	1	2	1	1	1	2	1	1	2	0	1	1	1	0	0	0	1	1	0	1	0	0	0	0	0	0	0	0	0	0	1	1
18	1	1	7	2	2	2	3	3	2	2	2	2	2	2	2	2	0	1	0	0	1	2	2	1	1	0	0	0	0	1	2	1	0	1	1	1	3	0	0	0	0	0	0	0	0	0	0	0	0
19	1	0	7	3	2	2	2	2	2	2	3	1	1	1	2	2	0	0	0	0	0	1	1	1	0	1	0	1	0	0	0	1	0	1	1	0	0	0	0	0	0	0	0	0	0	0	0	0	0
19	1	1	7	3	2	3	3	2	1	1	0	1	2	1	2	2	0	0	3	0	3	2	3	1	1	1	2	2	1	0	0	0	1	2	2	0	2	0	0	0	0	0	0	0	0	0	0	2	1
19	1	0	7	2	2	3	3	2	3	2	1	2	1	1	2	2	1	1	0	0	1	0	2	2	1	1	1	1	1	2	2	1	1	1	1	1	0	0	0	0	0	0	0	0	0	0	0	0	0
19	1	0	7	3	3	2	1	1	2	2	2	2	2	1	2	3	0	0	1	1	1	2	1	2	1	1	1	1	2	2	0	1	1	2	1	0	1	0	0	0	0	0	0	1	1	1	0	1	1
18	1	0	7	2	3	3	3	3	2	2	1	2	2	2	1	2	0	1	2	1	2	2	2	1	2	1	0	0	0	1	0	1	1	1	1	0	0	0	0	0	0	0	0	0	0	0	0	0	0
19	1	0	7	1	3	3	3	3	1	1	3	2	2	2	3	2	1	1	3	1	2	2	3	0	1	1	0	0	0	0	1	1	0	0	1	0	1	0	0	0	0	0	0	0	0	0	0	0	0
18	1	0	7	2	3	2	2	1	2	3	2	2	1	2	3	3	1	1	0	1	1	2	2	1	1	2	1	1	1	1	0	1	1	2	1	0	0	0	0	1	1	0	0	1	1	2	2	0	0
19	1	0	7	2	2	3	3	2	2	3	2	2	2	2	2	2	0	3	3	1	3	0	3	1	0	2	0	0	0	0	1	1	0	1	1	0	0	0	0	0	0	0	0	0	0	0	0	0	0
19	1	1	7	2	3	2	3	2	2	3	3	2	2	3	2	2	0	1	2	1	2	2	3	1	1	2	0	0	0	1	1	1	1	1	1	0	3	0	0	0	0	0	0	0	0	0	0	0	0
19	1	1	7	1	2	3	3	3	1	1	2	2	3	3	3	3	0	2	0	0	0	0	1	1	0	1	0	0	0	1	1	1	0	1	1	0	1	0	0	0	0	0	0	0	0	0	0	0	0
19	1	1	7	2	2	3	1	2	2	2	2	3	2	1	3	2	0	1	1	1	0	1	3	1	2	1	1	1	1	0	2	1	1	1	1	0	0	0	0	0	0	0	0	0	0	0	0	0	0
20	1	1	7	0	3	2	3	2	2	2	3	2	2	2	2	1	0	0	0	0	0	0	1	1	1	1	0	0	0	1	0	0	0	0	0	0	0	0	0	0	0	0	0	0	0	0	0	1	0
19	1	0	7	1	2	3	2	1	3	1	2	0	0	3	2	2	0	0	0	0	0	3	3	1	0	1	0	0	2	0	2	1	1	0	0	0	0	0	0	0	0	0	0	0	0	0	0	0	0
20	1	1	7	3	3	3	3	2	3	2	2	2	3	3	3	0	0	0	1	1	0	0	2	1	1	2	0	1	1	1	2	1	0	2	2	0	0	0	0	0	0	0	0	0	0	0	0	0	0
19	1	1	7	2	3	2	2	2	2	3	2	2	2	1	3	2	0	2	1	2	1	1	2	1	1	2	1	1	0	1	0	1	1	1	1	0	0	0	0	0	0	0	0	0	0	0	0	0	0
19	1	1	7	2	3	3	3	2	1	2	3	2	3	3	2	2	0	1	0	1	1	1	3	1	1	1	0	1	0	1	1	1	0	2	1	1	1	0	0	0	0	0	0	0	0	0	0	0	0
18	1	1	7	2	3	3	2	3	2	2	1	2	2	1	2	2	0	0	2	0	1	2	3	1	1	2	0	0	0	1	0	1	0	1	1	1	0	0	0	0	0	0	0	0	0	0	0	0	0
19	1	0	7	2	2	2	2	2	2	2	2	2	2	2	2	2	2	2	2	2	2	2	2	1	3	1	3	1	2	1	2	2	1	2	1	1	1	0	0	0	0	0	0	0	0	0	0	0	0
20	1	0	7	1	2	3	2	2	2	2	3	1	3	3	2	3	2	3	2	3	2	3	2	1	1	0	2	2	1	2	0	2	1	3	1	0	3	1	1	0	0	0	0	0	0	0	0	1	0
19	1	0	7	2	3	1	3	2	2	2	3	3	2	1	2	1	0	1	2	1	3	1	3	1	1	1	0	0	0	1	1	1	0	1	1	0	2	1	0	0	0	0	0	1	0	0	0	1	1
20	1	0	7	2	3	1	2	2	1	1	3	3	3	2	3	3	0	0	1	2	1	1	1	1	1	1	0	1	0	1	0	3	0	2	1	0	3	0	0	0	0	0	0	0	0	0	0	0	0
20	1	0	7	1	3	2	3	1	1	2	2	2	2	3	2	1	0	0	0	1	0	0	1	1	1	0	0	0	1	0	1	1	1	1	1	0	0	0	0	0	0	0	0	0	0	0	0	0	0
18	1	0	7	2	2	2	2	2	2	2	0	1	3	0	1	2	0	0	1	0	0	0	1	2	1	1	0	1	1	0	2	0	2	1	1	1	1	0	0	0	0	0	0	0	0	0	0	1	0
19	1	0	7	3	2	1	0	1	3	1	0	1	1	1	2	2	0	0	0	0	0	0	1	1	1	1	2	0	1	1	1	1	1	1	0	0	2	0	0	0	0	0	0	0	0	0	0	0	0
19	1	0	7	0	2	2	2	2	2	2	2	2	2	1	1	2	0	0	0	0	1	0	1	1	1	1	1	1	1	1	0	1	0	0	1	1	1	0	0	0	0	0	0	0	0	0	0	0	0
18	1	0	7	2	2	3	3	3	1	2	2	2	3	3	1	1	0	1	1	1	1	2	2	1	1	1	0	1	2	2	1	2	1	1	1	1	0	0	0	0	0	0	0	0	0	0	0	0	0
18	1	0	7	2	3	1	2	2	2	1	3	2	2	1	2	1	0	2	2	2	1	1	2	1	2	1	0	0	0	2	0	2	0	1	1	1	0	1	1	1	1	0	0	0	0	0	0	0	0
20	1	1	7	2	2	2	2	2	1	2	2	2	2	2	2	2	0	1	1	0	0	1	2	1	0	0	2	0	1	0	2	1	1	2	1	0	1	0	0	0	0	0	0	0	0	0	0	0	0
19	1	0	7	2	3	1	1	3	2	3	2	2	1	1	2	3	0	1	2	0	1	2	2	1	1	1	1	1	1	0	2	2	0	1	1	1	2	0	0	0	0	0	0	0	0	0	0	0	0
19	1	1	7	2	3	1	3	1	2	2	3	1	0	1	2	3	0	1	0	1	0	1	2	1	1	3	2	2	1	1	0	1	0	2	1	1	0	1	0	0	0	0	0	0	0	1	1	1	0
19	1	1	7	2	3	1	3	1	3	3	3	3	3	3	3	0	0	0	0	1	2	0	3	1	0	1	0	1	0	1	1	1	0	1	0	0	1	0	0	1	1	0	0	1	0	0	0	0	0
19	1	1	7	2	2	3	3	3	2	2	2	1	2	2	1	1	0	0	0	0	0	0	1	1	1	1	0	0	1	0	1	0	1	1	1	0	0	0	0	0	0	0	0	0	0	0	0	1	1
20	1	0	7	3	3	2	1	1	1	0	2	2	2	1	3	3	1	1	3	2	2	1	3	1	1	1	0	0	0	0	0	1	0	1	1	0	0	0	0	0	0	0	0	0	0	0	0	0	0
19	1	0	7	3	3	2	1	1	2	2	1	1	2	1	3	3	0	1	0	0	0	1	1	1	1	1	1	2	1	1	2	1	1	1	1	1	0	0	0	0	0	0	0	0	0	0	0	0	0
19	1	1	7	1	2	3	3	3	3	2	2	2	2	3	2	1	0	2	1	0	1	1	2	1	1	1	0	0	0	0	0	1	0	1	1	1	0	0	0	0	0	0	0	0	0	0	0	0	0
19	1	0	7	1	2	2	2	2	1	2	2	2	3	2	3	2	1	1	1	1	0	1	3	1	1	2	0	1	1	2	1	1	1	1	1	1	1	0	0	0	0	0	0	1	1	0	0	0	0
18	1	1	7	3	3	3	3	2	2	2	2	3	3	2	2	2	0	1	1	0	2	1	3	1	0	2	0	3	0	1	3	3	2	2	1	0	0	0	0	0	0	0	0	0	0	0	0	0	0
19	1	1	7	2	3	1	2	1	1	2	1	2	2	2	3	2	1	0	0	1	1	1	1	2	2	1	1	1	1	2	2	3	1	3	2	2	1	0	0	0	0	0	0	1	2	2	2	1	1
20	1	1	7	3	2	2	1	1	1	2	2	2	2	2	2	2	1	1	1	1	1	1	1	1	1	2	1	1	1	2	1	1	1	2	1	1	0	0	0	0	0	0	0	0	0	1	1	1	1
19	1	1	7	2	2	1	3	3	2	1	2	3	3	2	3	2	0	2	2	1	1	2	3	1	1	2	0	1	0	1	1	1	0	2	1	1	1	3	2	1	0	0	0	1	2	2	3	1	1
18	1	0	7	2	3	3	3	3	1	1	3	2	2	2	2	3	0	1	2	2	1	1	2	1	1	1	0	1	0	2	0	2	1	1	1	0	1	0	0	0	0	0	0	0	0	0	0	0	0
19	1	1	7	1	1	1	2	3	2	2	1	2	1	1	1	2	0	1	1	1	1	2	1	1	1	1	0	1	0	0	0	1	0	1	1	1	0	0	0	0	0	0	0	0	0	0	0	0	0
18	1	0	7	3	2	3	3	2	3	2	1	2	3	3	2	2	0	1	3	0	2	0	3	0	0	0	0	0	0	0	1	1	0	1	2	0	0	0	0	0	0	0	0	0	0	0	0	0	0
18	1	1	7	1	3	3	2	3	3	3	3	3	2	2	2	3	0	1	1	0	0	1	3	1	1	1	0	0	0	1	1	1	0	1	1	1	0	0	0	0	0	0	0	0	0	0	0	0	0
19	1	0	7	2	2	1	2	1	2	2	2	2	2	2	2	2	0	2	3	1	3	3	3	1	2	1	2	0	0	1	1	1	1	1	1	0	0	0	0	0	0	0	0	0	0	1	1	0	0
19	1	0	7	2	3	2	2	2	3	2	1	1	2	1	2	2	0	1	2	1	2	2	3	1	1	1	0	0	0	1	1	1	0	1	1	0	1	0	0	0	0	0	0	1	1	1	1	0	0
19	1	1	7	1	1	2	2	3	1	2	2	2	3	1	4	2	0	3	1	2	1	3	3	1	1	1	0	1	0	0	2	1	2	1	1	0	1	0	0	0	0	0	0	0	0	0	0	0	0
19	1	1	7	2	1	2	2	2	2	1	2	2	2	1	1	2	0	1	1	1	0	1	1	1	1	2	1	2	2	1	0	2	1	1	1	1	2	0	0	0	0	0	0	0	0	0	0	0	0
20	1	0	7	2	3	3	2	2	2	2	3	2	2	2	2	2	0	1	1	1	1	1	2	0	0	0	0	0	0	0	0	1	0	0	0	0	0	0	0	0	0	0	0	0	0	0	0	0	0
19	1	0	7	1	3	1	2	2	1	2	3	2	2	1	1	1	0	1	0	3	1	2	2	1	1	1	1	0	0	1	0	1	1	1	1	0	1	0	0	0	0	0	0	0	0	0	0	1	2
18	1	0	7	1	3	2	2	2	3	2	3	2	1	1	1	2	0	0	0	1	2	2	2	2	0	1	2	2	2	0	0	1	1	0	0	0	1	0	0	0	0	0	0	0	0	0	0	0	0
19	1	1	7	3	3	3	3	2	2	2	3	3	3	3	2	2	0	1	0	0	1	1	2	1	1	2	0	0	0	1	1	1	0	1	1	1	1	0	0	0	0	0	0	0	0	0	0	0	0
19	1	0	7	2	2	2	2	2	2	2	1	2	3	2	2	2	0	1	1	2	2	2	2	1	1	1	0	1	1	1	0	2	1	1	1	1	1	0	0	1	1	1	1	0	0	1	1	0	0
18	1	0	7	2	1	2	2	2	2	2	2	2	2	2	2	1	1	1	1	1	1	0	0	1	1	1	0	1	1	1	2	1	2	2	1	0	1	0	0	0	0	0	0	0	0	0	0	0	0
20	1	0	7	1	3	1	0	0	0	0	3	2	0	1	1	2	0	1	1	3	3	1	1	1	1	0	0	1	1	1	1	1	0	1	1	0	0	0	0	0	0	0	0	0	0	0	0	0	0
19	1	1	7	1	3	2	2	2	1	0	2	2	2	1	2	2	0	0	1	1	1	1	1	1	1	1	0	1	1	1	2	1	1	1	1	0	0	0	0	0	0	0	0	0	0	0	0	0	0
19	1	0	7	2	2	2	2	2	2	2	2	2	2	2	2	2	2	2	2	2	2	2	2	1	0	2	0	1	0	1	0	1	0	1	1	2	1	0	0	0	0	0	0	0	0	0	0	1	2
19	1	0	7	2	3	3	3	3	2	2	3	2	2	2	3	2	1	1	1	1	1	1	3	0	0	0	0	2	1	2	0	1	1	0	0	2	0	0	0	0	0	0	0	0	0	0	0	1	1
20	1	1	7	3	1	3	3	3	2	2	2	3	1	3	1	3	1	0	3	0	0	1	2	1	1	1	0	1	1	0	1	1	1	2	1	1	0	0	0	1	1	0	0	0	0	1	1	0	0
18	1	1	7	1	1	1	1	1	1	1	3	2	2	1	1	1	0	1	1	2	2	1	1	2	1	2	1	2	2	2	0	1	1	2	2	0	1	0	0	0	0	0	0	0	0	1	4	1	4
20	1	0	7	0	1	3	2	2	1	1	1	1	1	1	1	1	1	1	1	1	1	1	1	1	1	2	1	1	2	1	1	0	2	1	1	2	1	0	0	0	0	0	0	0	0	0	0	0	0
19	1	1	7	2	2	3	3	2	1	2	2	1	2	2	2	1	0	1	1	0	0	1	1	1	1	2	0	0	0	1	0	1	1	1	0	0	3	0	0	0	0	0	0	0	0	0	0	0	0
17	1	0	7	2	2	3	3	2	3	3	3	3	3	3	2	2	0	2	2	2	2	2	2	1	1	1	0	0	0	1	0	1	0	1	1	1	2	0	0	0	0	2	2	0	0	0	0	2	2
20	1	1	7	2	3	3	3	3	2	1	1	1	2	3	2	3	3	2	2	1	1	3	3	1	1	1	0	1	0	1	0	1	0	1	1	1	1	0	0	0	0	0	0	0	0	0	0	0	0
18	1	1	7	3	3	3	3	3	2	2	1	2	2	3	3	3	0	0	1	0	0	2	3	1	1	2	0	2	1	1	1	2	0	1	1	1	1	0	0	0	0	0	0	0	0	0	0	0	0
19	1	0	7	3	3	3	3	3	3	3	3	3	3	3	3	3	3	1	3	0	0	1	2	1	0	2	0	0	0	0	1	1	0	1	0	0	0	0	0	0	0	0	0	0	0	0	0	0	0
18	1	1	7	2	3	1	3	3	2	2	3	3	1	2	1	0	0	1	0	0	0	0	1	1	0	1	0	1	0	0	1	1	0	1	1	1	1	0	0	0	0	0	0	0	0	0	0	0	0
20	1	0	7	2	3	3	3	3	2	2	2	2	2	3	3	3	0	2	2	2	2	2	3	1	2	1	0	1	1	0	0	1	0	1	1	0	0	0	0	2	2	0	0	0	0	0	0	0	0
20	1	0	7	3	3	2	1	1	3	3	3	3	2	2	3	1	1	0	0	2	0	2	2	1	0	2	1	3	2	0	2	2	1	3	3	2	0	0	0	2	1	0	0	0	0	1	1	2	1
18	1	0	7	2	3	2	2	2	2	2	2	2	2	1	3	3	0	0	0	1	0	0	1	1	0	1	1	1	1	1	2	1	0	0	1	0	0	0	0	0	0	0	0	0	0	0	0	0	0
18	1	0	7	3	3	2	3	3	2	3	3	3	3	2	2	3	0	0	0	0	2	1	2	1	3	2	2	1	1	1	1	1	1	1	1	1	1	1	0	0	0	0	0	2	1	2	1	0	0
19	1	0	7	3	3	3	3	3	3	3	3	3	3	3	2	1	1	1	1	2	1	3	3	1	0	2	0	0	0	0	2	1	0	1	1	1	0	0	0	2	2	0	0	2	4	3	4	2	4
19	1	0	7	3	3	3	3	3	2	2	3	3	2	3	3	3	0	2	2	2	1	1	3	1	1	2	1	1	0	1	1	1	0	1	1	0	0	0	0	0	0	0	0	0	0	0	0	0	0
20	1	0	7	0	1	1	1	0	1	1	1	2	3	1	2	2	1	1	1	3	2	1	3	1	2	1	2	1	2	1	1	2	1	2	1	0	0	0	0	0	0	0	0	0	0	0	0	0	0
19	1	1	0	1	3	2	3	3	3	2	3	2	2	3	1	2	0	3	0	1	1	1	1	0	1	0	0	1	0	1	0	1	0	0	1	0	3	1	1	1	1	0	0	1	3	0	0	1	2
19	1	1	0	2	2	1	1	0	2	2	1	3	1	1	2	1	0	0	0	0	1	0	1	1	0	3	0	0	0	0	0	0	0	1	1	1	0	1	1	1	1	0	0	1	2	1	1	0	0
17	1	1	0	1	3	2	1	1	2	2	2	1	1	1	2	3	0	1	1	0	0	1	2	1	0	1	0	1	0	1	1	0	1	0	2	1	0	0	0	1	2	0	0	0	0	0	0	0	0
19	1	1	0	2	1	3	3	3	3	3	1	2	2	2	3	3	1	0	0	0	1	3	3	1	1	0	0	0	0	0	1	1	0	1	1	0	0	1	1	1	1	0	0	2	2	1	1	1	1
19	1	1	0	2	1	2	2	3	2	2	1	2	2	1	1	1	0	0	1	0	1	1	1	1	1	0	0	0	0	0	0	0	0	0	0	0	0	0	0	2	2	0	0	2	2	0	0	1	2
20	1	0	0	1	2	2	2	2	0	2	2	2	2	1	1	2	0	0	0	1	1	0	0	1	1	1	0	0	0	0	1	1	0	1	1	0	0	0	0	0	0	0	0	0	0	0	0	1	1
19	1	1	0	3	1	3	2	3	2	3	1	3	3	1	3	0	0	1	0	0	2	1	3	1	0	0	1	0	0	0	2	0	0	1	1	0	3	0	0	0	0	0	0	1	1	1	2	1	2
19	1	0	0	3	3	2	3	1	2	2	3	1	1	2	0	1	0	0	1	1	0	0	0	1	1	0	0	0	0	1	2	1	0	1	1	0	0	0	0	0	0	0	0	0	0	0	0	0	0
18	1	0	0	2	2	1	2	2	2	2	2	2	1	2	2	2	2	2	2	2	2	2	2	1	1	0	0	2	2	1	1	2	1	1	1	1	1	0	0	0	0	0	0	0	0	0	0	0	0
18	1	1	0	2	3	2	3	3	3	3	3	3	2	2	2	3	0	1	2	2	2	2	2	2	1	1	0	2	1	1	0	1	1	1	2	1	0	0	0	0	0	0	0	0	0	0	0	0	0
18	1	1	0	2	3	3	3	3	2	3	3	3	2	2	3	2	0	1	1	1	0	0	1	1	1	0	1	0	0	0	2	1	0	1	1	1	1	0	0	1	1	0	0	1	1	1	1	1	1
18	1	1	7	1	1	2	1	1	1	2	2	2	2	1	3	3	0	1	2	2	2	2	2	2	1	2	0	2	0	2	1	1	1	2	2	1	1	0	0	0	0	0	0	0	0	1	1	0	0
19	1	1	7	2	3	3	3	2	3	3	3	3	3	3	3	3	0	0	0	0	0	1	2	0	1	0	2	1	1	1	0	1	0	1	1	0	1	0	0	0	0	0	0	0	0	0	0	0	0
20	1	1	7	3	1	3	3	2	3	3	1	3	2	3	3	2	0	0	0	1	1	1	2	1	1	1	0	0	0	1	1	1	0	1	0	0	0	0	0	1	1	0	0	0	0	2	2	0	0
20	1	1	7	2	2	2	2	2	1	2	2	2	2	1	2	2	0	1	2	2	3	2	3	1	1	1	0	0	0	1	1	2	0	0	0	1	1	0	0	0	0	0	0	0	0	0	0	0	0
19	1	1	7	1	2	3	3	3	2	2	2	2	2	2	1	3	0	0	0	0	0	1	1	1	0	1	0	1	0	1	1	1	0	1	0	0	0	0	0	0	0	0	0	0	0	0	0	0	0
20	1	1	7	3	2	3	3	2	2	1	1	2	1	1	2	1	0	0	1	1	0	0	2	1	1	1	2	1	0	0	1	1	0	0	1	0	0	0	0	0	0	0	0	0	0	1	0	0	0
18	1	1	7	2	3	3	3	3	3	2	2	2	2	1	2	3	0	1	1	1	2	0	2	1	0	2	0	0	0	0	0	2	0	1	0	0	1	0	0	0	0	0	0	0	0	0	0	0	0
19	1	1	7	1	3	2	2	0	1	0	3	2	3	1	2	1	0	0	0	1	2	0	2	1	1	1	2	0	0	2	2	1	1	3	2	0	0	0	0	0	0	0	0	0	0	0	0	0	0
19	1	1	7	1	1	3	2	3	2	3	3	2	3	0	2	3	0	1	1	1	1	1	2	1	1	1	2	1	0	0	0	1	1	1	1	1	0	2	2	0	0	0	0	1	1	2	2	1	1
19	1	0	7	2	3	0	0	1	1	2	2	2	2	0	3	3	0	1	0	1	1	1	3	1	1	0	1	1	1	2	1	0	1	1	1	1	1	0	0	0	0	0	0	0	0	0	0	0	0
18	1	1	7	2	2	2	2	2	2	2	3	3	3	2	3	3	0	0	0	1	1	1	2	1	1	1	0	0	0	0	1	0	0	0	1	0	0	1	0	0	0	0	0	0	0	0	0	0	0
20	1	1	7	3	1	2	3	3	3	2	2	3	3	2	2	3	0	0	1	0	1	1	2	1	1	2	0	0	0	1	1	2	0	1	1	0	0	0	0	0	0	0	0	0	0	0	0	0	0
18	1	0	7	3	2	3	3	2	3	3	2	3	3	3	3	3	0	2	3	1	2	1	3	1	1	2	2	2	0	1	0	2	0	2	2	1	1	0	0	0	0	0	0	0	0	0	0	1	1
18	1	1	7	2	2	3	2	2	1	2	1	1	1	1	2	2	0	0	1	1	0	1	2	1	1	1	0	2	1	2	1	1	1	1	1	0	0	0	0	0	0	0	0	0	0	0	0	0	0
19	1	0	7	3	1	3	3	2	2	1	1	2	2	1	3	3	0	1	2	1	0	1	3	1	0	1	0	0	0	1	2	1	0	1	1	1	1	0	0	0	0	0	0	0	0	0	0	0	0
19	1	0	7	1	3	2	2	2	1	1	2	2	2	1	3	1	0	2	2	2	3	3	3	1	0	2	0	0	0	2	0	3	1	2	1	0	1	0	0	0	0	0	0	0	0	1	1	1	1
19	1	1	7	2	3	2	2	3	2	2	3	2	2	2	2	3	0	2	2	1	1	1	2	1	1	3	2	2	1	1	2	1	1	1	1	1	0	0	0	1	1	0	0	1	1	1	1	1	1
19	1	0	7	2	1	1	1	1	2	2	1	2	2	1	1	1	0	1	1	0	1	1	1	1	1	1	2	0	0	1	2	0	1	1	0	1	0	0	0	0	0	0	0	0	0	0	0	0	0
18	1	0	7	1	2	3	3	3	1	2	3	3	3	2	3	3	0	0	0	0	1	0	2	1	1	2	1	1	0	1	0	1	2	1	3	0	1	0	0	1	1	0	0	0	0	0	0	0	0
19	1	1	7	3	3	3	3	3	2	2	2	2	2	2	2	2	1	2	1	1	3	3	3	2	1	1	0	1	0	2	2	1	0	2	2	1	0	0	0	0	0	0	0	0	0	0	0	0	0
19	1	0	7	3	3	3	2	2	1	1	2	2	3	2	2	2	0	0	0	1	1	1	3	1	0	1	0	1	0	0	1	1	0	1	1	0	1	0	0	0	0	0	0	0	0	0	0	0	0
19	1	1	7	2	1	3	3	3	2	2	2	2	2	2	2	2	0	0	0	0	0	0	0	0	3	0	3	0	0	3	2	2	1	1	1	1	2	0	0	0	0	1	1	1	1	2	1	1	1
18	1	1	7	2	2	2	2	2	2	3	3	3	2	1	1	1	0	0	1	1	1	1	1	0	1	2	0	1	0	2	2	1	0	1	1	1	0	0	0	0	0	0	0	0	0	0	0	0	0
19	1	1	7	1	2	2	2	2	1	2	2	2	2	2	2	3	1	2	1	1	1	1	2	1	1	1	0	0	0	1	0	1	0	1	1	1	0	0	0	0	0	0	0	0	0	0	0	0	0
19	1	0	7	3	3	3	3	3	3	3	3	3	3	0	3	3	0	1	0	0	0	0	3	1	0	0	0	0	0	0	0	0	0	0	0	0	0	0	0	0	0	0	0	0	0	0	0	0	0
19	1	0	7	0	2	2	3	1	1	2	3	2	2	2	1	2	0	1	1	1	0	0	1	1	0	1	0	0	0	1	0	1	0	2	1	0	0	0	0	0	0	0	0	0	0	0	0	0	0
20	1	0	7	3	3	3	3	3	2	2	3	1	1	2	2	3	0	1	1	1	0	1	2	1	2	2	0	1	0	1	1	0	0	0	1	0	2	0	0	0	0	0	0	0	0	0	0	0	0
18	1	0	7	3	1	3	3	1	3	3	3	3	3	3	3	3	0	3	3	1	3	2	3	1	1	2	0	1	0	1	3	2	0	2	1	2	0	2	3	0	0	0	0	1	0	0	0	2	3
18	1	0	7	3	3	3	3	3	2	1	2	2	2	1	1	0	0	0	1	1	0	2	2	0	0	0	2	1	0	3	0	1	0	0	1	1	1	0	0	0	0	0	0	0	0	0	0	0	0
21	1	1	7	1	3	2	2	1	1	2	2	2	2	2	3	3	0	1	0	1	2	2	2	2	1	2	2	2	1	1	0	1	1	3	2	1	1	0	0	0	0	0	0	0	0	0	0	0	0
19	1	0	7	2	3	1	2	1	3	2	3	3	3	3	2	1	0	1	2	1	3	0	2	1	1	1	0	0	0	1	0	1	0	1	1	0	0	0	0	0	0	0	0	0	0	0	0	0	0
20	1	0	7	2	3	3	3	2	1	2	2	2	2	2	2	2	0	1	1	0	0	1	3	1	1	1	0	0	0	1	0	1	0	1	1	0	0	0	0	0	0	0	0	0	0	0	0	0	0
19	1	0	7	3	3	2	3	1	2	2	2	3	3	2	3	3	0	2	3	2	3	2	2	1	1	2	0	1	0	1	0	1	0	2	0	0	3	0	0	0	0	0	0	0	0	0	0	0	0
19	1	1	7	1	2	1	1	1	1	1	2	1	2	2	2	2	0	1	1	1	2	1	1	1	1	2	1	2	2	2	1	2	2	2	1	1	1	0	0	0	0	0	0	0	0	0	0	0	0
19	1	0	7	2	3	2	3	2	3	2	2	3	3	2	3	1	0	1	0	1	0	1	1	1	1	2	0	1	0	1	1	1	0	1	1	0	3	0	0	0	0	0	0	0	0	0	0	0	0
18	1	1	7	3	3	3	3	3	3	2	3	3	1	3	3	3	0	3	1	2	1	1	3	1	0	1	0	1	0	1	0	1	0	2	1	1	0	0	0	0	0	0	0	0	0	0	0	0	0
19	1	0	7	0	3	2	1	1	2	2	2	2	2	0	2	2	2	1	0	0	0	0	2	1	1	2	1	2	1	2	0	0	1	2	2	0	1	0	0	0	0	0	0	0	0	0	0	0	0
18	1	0	7	1	2	2	2	2	1	2	2	2	1	1	2	2	0	1	1	0	0	0	1	1	1	2	1	0	1	2	2	1	1	1	1	1	2	0	0	0	0	0	0	0	0	1	0	0	0
19	1	0	7	2	3	2	3	3	1	2	2	2	2	2	2	0	0	3	2	0	2	0	2	1	1	2	0	1	1	0	1	1	1	1	1	1	2	0	0	0	0	0	0	0	0	1	1	0	0
18	1	0	7	3	3	3	3	3	3	3	3	3	3	2	3	2	1	1	1	1	0	2	3	1	0	2	0	0	0	1	1	1	0	0	1	1	0	0	0	0	0	0	0	0	0	0	0	0	0
18	1	0	7	3	3	3	3	3	2	2	2	1	1	3	1	3	0	1	2	2	2	2	2	1	1	0	0	0	0	1	0	0	0	0	0	0	0	0	0	0	0	0	0	0	0	0	0	0	0
19	1	0	7	2	2	2	2	2	1	2	2	2	2	2	3	3	0	3	1	2	3	3	3	2	0	1	1	1	1	1	3	1	0	2	1	1	0	0	0	0	0	0	0	0	0	0	0	0	0
19	1	0	7	1	1	3	2	2	1	1	1	1	1	0	1	0	2	0	0	0	1	0	3	1	1	1	0	0	0	0	0	0	0	0	1	0	1	0	0	0	0	0	0	0	0	0	0	0	0
19	1	0	7	2	2	3	3	3	3	3	1	1	1	2	1	1	0	1	2	2	3	1	3	1	1	1	0	1	0	2	2	2	0	1	1	0	0	0	0	0	0	0	0	0	0	0	0	0	0
18	1	0	7	2	2	2	3	0	2	2	3	2	2	1	2	2	0	2	0	1	1	0	2	1	1	1	1	1	1	2	1	1	1	1	1	0	1	0	0	0	0	0	0	0	0	0	0	0	0
18	1	0	7	2	3	2	2	2	2	2	2	2	2	2	3	3	0	0	0	0	0	0	1	1	1	1	0	1	1	2	0	0	1	1	1	0	0	0	0	0	0	0	0	0	0	0	0	0	0
19	1	0	7	2	3	3	3	3	2	1	3	2	3	2	2	3	2	0	1	0	0	0	1	2	1	2	1	1	0	2	1	1	0	1	2	0	0	0	0	0	0	0	0	0	0	0	0	0	0
19	1	0	7	1	1	1	2	1	1	2	2	2	2	1	2	2	0	1	1	3	3	2	1	2	1	2	1	2	1	2	2	2	1	3	1	1	2	0	0	0	0	0	0	0	0	0	0	0	0
18	1	1	7	3	3	3	3	3	2	2	2	3	3	2	2	3	1	1	1	1	1	1	2	1	1	2	0	1	0	1	1	1	1	1	1	0	0	0	0	0	0	0	0	0	0	0	0	0	0
18	1	1	7	1	3	1	0	0	1	1	2	2	1	1	0	2	0	0	0	0	0	1	1	1	1	2	0	0	0	1	2	1	0	2	2	1	1	0	0	0	0	0	0	0	0	0	0	0	0
20	1	0	7	2	2	3	3	3	2	2	2	2	2	2	3	3	0	1	0	1	1	1	2	1	1	2	0	0	1	2	2	1	2	3	3	0	3	0	0	0	0	0	0	0	0	1	0	1	0
20	2	1	0	3	2	2	2	2	2	2	1	3	2	2	3	3	0	1	3	1	2	2	3	1	1	3	1	1	2	1	0	1	1	2	1	0	1	0	0	0	0	0	0	0	0	0	0	2	2
21	2	0	0	3	2	1	3	2	3	2	3	2	3	3	2	0	0	0	1	1	2	2	2	3	0	1	1	2	2	2	2	3	0	2	2	1	0	0	0	0	0	0	0	0	0	1	3	1	2
20	2	1	0	2	1	3	3	2	2	1	2	2	2	1	3	2	2	2	1	0	1	0	2	2	2	0	2	3	1	0	1	2	1	3	1	1	1	0	0	3	3	0	0	0	0	0	0	0	0
20	2	1	0	1	1	2	2	2	0	1	2	1	2	1	2	1	2	1	2	2	1	2	1	1	1	3	1	3	3	2	2	3	2	2	2	2	1	0	0	0	0	0	0	0	0	1	1	0	0
20	2	0	0	1	2	2	2	3	1	2	2	3	2	1	2	1	0	1	2	1	1	1	1	1	1	2	1	1	1	1	2	1	1	2	1	1	1	0	0	1	1	0	0	0	0	1	1	0	0
21	2	0	0	3	2	2	3	2	1	2	3	3	3	3	1	3	0	1	2	2	1	1	2	1	1	1	0	0	0	1	2	1	0	0	1	0	0	0	0	0	0	0	0	0	0	0	0	0	0
20	2	0	0	0	2	2	2	3	3	2	2	1	2	1	1	1	0	0	0	0	0	1	1	1	1	2	0	1	0	1	0	0	0	1	1	1	1	0	0	0	0	0	0	0	0	0	0	0	0
20	2	1	0	2	3	3	3	0	2	3	3	1	3	3	3	3	1	0	0	2	1	1	3	2	1	0	1	2	2	1	2	0	1	0	2	2	1	1	2	0	0	0	0	0	0	0	0	1	2
21	2	0	0	3	3	3	3	3	2	3	2	2	1	1	1	1	0	0	1	1	0	1	1	1	1	0	0	0	0	0	1	1	0	0	0	0	0	0	0	0	0	0	0	0	0	0	0	1	1
19	2	0	0	2	3	3	3	2	3	3	3	3	3	3	3	3	0	3	1	1	0	0	3	1	1	1	0	1	0	0	0	0	0	0	1	2	0	0	0	0	0	0	0	2	1	1	1	0	0
20	2	1	0	2	3	3	3	2	2	2	2	2	2	2	3	0	1	1	1	1	1	2	3	0	0	0	0	0	0	0	1	1	0	1	1	0	0	0	0	0	0	0	0	0	0	1	0	0	0
22	2	0	0	1	1	1	3	2	2	2	2	3	3	1	3	3	0	1	1	0	3	0	2	1	0	2	1	1	1	1	1	1	0	1	1	0	0	1	1	0	0	0	0	0	0	1	1	1	1
19	2	1	0	3	2	3	2	1	2	2	2	2	2	1	3	3	0	2	1	1	1	1	1	1	1	0	0	1	2	2	0	2	1	1	1	1	1	0	0	0	0	0	0	0	0	0	0	0	0
19	2	1	0	2	3	2	2	1	2	2	1	2	2	1	2	1	0	1	1	2	1	1	2	1	1	0	0	0	0	0	1	0	0	0	1	0	0	0	0	0	0	0	0	0	0	0	0	1	0
20	2	1	0	3	1	3	1	1	1	2	1	2	2	1	1	2	0	0	1	1	0	0	2	2	1	2	0	1	0	0	1	1	0	1	1	1	0	0	0	0	0	0	0	0	0	0	0	0	0
21	2	1	0	3	1	3	1	2	3	1	2	2	2	2	3	3	1	1	1	1	2	3	3	2	1	1	0	2	2	2	0	2	0	3	1	2	3	0	0	0	0	0	0	0	0	0	0	1	1
19	2	0	0	1	3	1	1	1	1	2	3	3	3	2	1	3	2	1	2	2	3	2	2	1	1	1	1	1	1	1	2	1	1	1	1	0	0	0	0	0	0	0	0	0	0	0	0	0	0
19	2	0	0	3	1	2	2	2	1	2	1	1	1	1	2	2	0	1	1	1	0	0	1	0	1	1	0	0	0	0	1	0	0	0	1	0	2	0	0	0	0	0	0	0	0	0	0	0	0
20	2	0	0	2	2	3	3	3	3	3	3	3	3	2	3	3	0	1	0	0	0	0	1	1	1	0	0	0	0	1	0	0	0	0	0	0	0	0	0	0	0	0	0	0	0	0	0	0	0
21	2	1	0	1	3	2	0	1	2	2	2	2	2	0	0	1	0	0	0	0	0	0	0	1	0	0	0	0	0	1	1	0	0	0	1	0	1	0	0	0	0	0	0	0	0	0	0	0	0
20	2	1	0	2	3	2	1	1	2	1	2	1	3	1	1	1	0	2	2	1	1	3	3	2	0	2	1	2	2	1	0	1	1	1	1	1	3	0	0	0	0	0	0	0	0	0	0	0	0
20	2	1	0	2	2	2	3	2	1	2	2	2	2	2	2	2	0	1	0	1	1	0	1	1	1	1	0	1	0	1	0	1	0	1	1	1	2	0	0	0	0	0	0	0	0	0	0	0	0
20	2	0	0	3	1	1	2	2	2	2	1	2	2	2	2	2	1	1	2	1	2	3	2	2	0	2	1	2	1	0	2	2	1	2	2	1	0	0	0	0	0	0	0	1	1	1	1	0	0
19	2	0	0	3	3	2	2	1	3	2	3	3	3	1	2	3	0	1	1	2	2	3	2	1	2	2	2	1	2	1	2	2	1	3	2	0	0	0	0	0	0	0	0	0	0	0	0	0	0
20	2	0	0	2	3	3	2	2	2	1	2	1	2	3	3	2	0	0	0	0	1	1	2	1	1	1	0	1	0	1	1	3	0	1	0	0	1	0	0	0	0	0	0	0	0	0	0	0	0
20	2	1	0	1	2	1	2	2	1	2	1	2	1	2	2	2	1	2	1	2	2	2	1	1	2	1	1	2	0	0	0	1	2	2	1	1	1	0	0	0	0	0	0	0	0	0	0	0	0
19	2	0	0	0	1	2	2	1	1	1	1	2	1	2	2	2	0	0	0	0	1	0	1	0	1	2	1	1	1	1	2	1	1	1	1	0	2	0	0	0	0	0	0	0	0	0	0	0	0
18	2	0	0	1	2	1	2	3	2	1	1	2	2	1	3	3	0	2	3	2	3	2	3	1	1	1	2	1	1	1	1	1	2	2	1	0	3	0	0	0	0	0	0	0	0	0	0	1	1
20	2	1	0	3	3	3	3	3	3	3	3	3	2	3	3	3	1	0	0	0	0	0	0	1	1	2	0	0	0	0	0	0	0	1	1	0	0	0	0	0	0	0	0	1	1	2	2	0	0
21	2	0	0	2	3	3	2	2	1	2	2	2	2	2	0	0	0	1	0	1	0	0	1	1	1	0	0	0	0	1	1	1	0	1	0	0	0	0	0	0	0	0	0	0	0	0	0	0	0
20	2	0	0	2	3	2	2	2	3	3	3	3	3	3	2	3	3	0	1	1	2	0	2	1	1	0	0	1	0	1	2	1	1	0	1	0	0	0	0	0	0	0	0	0	0	0	0	0	0
20	2	0	0	2	1	1	2	2	1	1	0	2	1	0	1	2	0	1	1	0	1	1	3	1	1	1	1	0	1	1	2	1	1	0	1	0	1	0	0	0	0	0	0	0	0	1	1	1	1
20	2	1	0	1	3	3	2	2	1	2	3	1	2	3	3	3	0	1	0	1	1	0	3	1	0	1	0	1	0	1	0	1	0	2	1	0	0	0	0	0	0	0	0	0	0	0	0	1	1
20	2	1	0	1	2	3	3	2	3	3	2	2	1	1	2	1	0	0	0	0	0	1	2	1	1	2	0	3	0	1	0	1	0	2	1	1	0	0	0	0	0	0	0	0	0	0	0	1	1
21	2	1	0	3	2	3	3	2	3	3	3	2	3	3	3	3	0	0	0	0	0	0	1	0	0	0	0	0	0	0	0	1	0	1	0	0	0	0	0	0	0	0	0	0	0	0	0	0	0
20	2	1	0	2	3	3	3	3	3	2	2	2	2	3	3	1	0	0	1	1	2	1	3	1	1	1	0	1	0	1	1	3	0	1	0	0	1	0	0	0	0	0	0	0	0	0	0	0	0
20	2	0	0	3	2	2	3	2	3	3	1	3	3	1	3	3	0	0	0	0	0	0	1	1	1	0	0	1	0	0	1	1	0	0	0	1	0	0	0	0	0	0	0	0	0	0	0	0	0
20	2	1	0	2	2	3	3	2	1	2	2	2	2	3	0	3	0	1	0	1	2	1	3	1	1	0	0	0	0	1	0	0	0	1	1	0	0	0	0	0	0	0	0	0	0	0	0	0	0
21	2	1	0	3	2	2	3	3	3	1	3	1	3	1	0	0	0	1	0	1	1	0	2	1	0	0	0	0	1	0	0	1	0	0	0	0	0	0	0	0	0	0	0	0	0	0	0	0	0
20	2	1	0	1	3	2	3	1	2	2	2	2	2	2	2	1	0	1	0	0	0	0	1	1	1	2	3	0	0	1	1	1	0	1	1	0	0	0	0	0	0	0	0	0	0	0	0	0	0
20	2	0	0	2	3	3	2	3	2	1	2	2	3	1	3	2	0	1	1	1	3	0	3	1	1	2	0	1	0	1	0	1	1	1	1	0	1	0	0	1	1	0	0	0	0	0	0	0	0
19	2	0	0	2	1	2	3	1	2	1	1	2	2	1	2	3	0	3	3	1	2	2	3	1	1	1	2	1	1	0	0	1	1	1	1	0	1	0	0	0	0	0	0	0	0	0	0	0	0
19	2	1	0	2	1	2	2	2	1	2	2	2	1	1	2	2	0	1	1	1	1	1	2	1	1	2	1	2	1	2	2	1	1	1	1	0	1	0	0	0	0	0	0	0	0	0	0	0	0
20	2	0	0	1	2	3	3	1	2	2	3	2	2	2	2	3	0	1	0	1	0	1	1	1	1	1	0	1	2	1	2	0	0	1	1	0	1	0	0	0	0	0	0	0	0	0	0	0	0
20	2	1	0	1	3	1	1	1	2	2	3	1	2	1	2	3	0	1	3	2	2	2	2	2	0	2	2	2	1	2	1	1	1	1	2	1	2	0	0	0	0	0	0	0	0	0	0	0	0
19	2	0	0	2	3	3	3	3	2	2	3	2	2	2	2	2	0	2	0	1	1	2	2	1	0	2	0	2	0	2	0	1	0	1	1	1	1	0	0	0	0	0	0	0	0	0	0	1	1
19	2	0	0	1	2	3	3	1	1	1	1	2	2	2	3	2	0	1	1	2	1	2	1	1	0	1	2	0	0	1	0	0	0	1	0	0	1	0	0	0	0	0	0	0	0	0	0	0	0
20	2	0	0	2	1	2	2	2	1	1	1	2	2	1	1	1	0	1	2	1	1	1	2	2	1	2	0	1	0	1	1	0	1	1	1	0	1	0	0	0	0	0	0	0	0	0	0	0	0
19	2	1	0	2	2	2	2	1	1	2	1	2	2	3	1	3	0	0	1	0	0	0	1	1	0	0	0	0	0	1	0	0	0	0	0	0	0	0	0	0	0	0	0	0	0	0	0	0	0
20	2	0	0	2	2	2	2	2	1	1	2	2	2	1	1	2	0	1	1	1	1	1	1	1	0	1	0	0	0	0	1	0	0	1	0	0	1	0	0	0	0	0	0	0	0	0	0	0	0
22	2	0	0	2	3	1	3	3	1	1	1	1	1	1	3	3	1	3	3	1	3	3	3	1	0	0	0	1	0	1	1	0	0	0	0	0	0	1	1	0	0	0	0	0	0	0	0	0	0
21	2	1	0	1	3	3	3	2	1	2	3	2	3	3	1	2	0	0	1	1	0	2	2	2	1	1	0	0	0	0	0	3	0	2	1	1	0	1	1	0	0	0	0	1	1	2	1	1	1
20	2	0	0	1	3	2	1	1	2	2	3	1	2	2	1	1	0	1	0	0	0	0	3	1	0	0	0	0	0	0	0	1	0	1	1	1	0	0	0	0	0	0	0	0	0	1	1	1	1
20	2	1	0	3	3	3	3	3	3	2	3	3	3	2	3	2	0	3	2	2	2	2	3	1	1	2	0	2	0	1	2	3	0	3	1	1	0	0	0	0	0	0	0	0	0	1	1	0	0
19	2	0	0	2	3	1	0	3	3	3	3	1	3	3	3	0	0	0	1	3	2	3	3	1	2	1	0	1	0	1	0	1	1	1	1	0	0	0	0	0	0	0	0	0	0	0	0	0	0
18	2	0	0	3	3	3	3	2	3	2	3	3	1	1	1	3	0	0	1	1	0	1	2	1	0	1	0	0	0	0	1	0	0	1	0	0	0	0	0	0	0	0	0	0	0	0	0	0	0
20	2	0	0	1	1	2	2	3	1	2	2	1	3	3	1	2	0	0	0	0	0	0	0	1	1	1	0	1	1	1	1	1	0	1	0	1	0	0	0	0	0	0	0	0	0	0	0	0	0
20	2	0	0	2	2	1	1	0	3	2	2	3	1	3	0	1	0	0	0	0	0	0	0	1	0	1	1	1	0	0	1	2	0	0	0	0	0	0	0	0	0	0	0	0	0	0	0	0	0
20	2	1	0	3	3	3	3	3	2	1	2	2	2	2	3	3	0	0	3	2	0	0	2	1	0	0	0	0	0	0	1	0	0	0	0	0	0	0	0	2	2	0	0	0	0	0	0	0	0
21	2	0	0	2	3	3	3	3	3	2	2	2	2	2	1	1	0	1	1	1	1	1	1	1	1	1	0	0	0	1	1	1	0	2	1	1	0	0	0	0	0	0	0	0	0	0	0	0	0
20	2	0	0	3	3	2	3	2	2	2	2	2	2	3	3	3	0	1	2	1	1	1	3	1	1	1	1	1	1	1	0	1	1	1	1	1	0	0	0	0	0	0	0	0	0	0	0	0	0
21	2	1	0	1	2	2	1	2	1	2	1	2	1	1	2	1	0	1	1	0	1	0	1	1	1	2	0	1	1	1	1	2	0	1	1	0	2	0	0	0	0	0	0	0	0	0	0	0	0
21	2	0	0	2	2	2	1	1	2	2	2	2	1	3	3	3	0	1	0	2	2	1	1	1	1	2	2	2	1	2	1	2	2	2	1	0	2	0	0	0	0	0	0	0	0	0	0	1	2
20	2	1	0	3	3	1	3	2	2	1	3	2	3	1	1	3	0	0	0	0	1	1	2	1	2	1	2	2	1	2	0	1	2	1	2	0	0	2	1	0	0	0	0	1	0	0	0	0	0
20	2	1	0	2	3	2	3	3	3	3	3	3	3	1	2	1	0	0	1	0	3	1	3	1	1	0	0	0	0	0	1	1	1	0	1	0	0	2	2	0	0	0	0	0	0	1	1	0	0
20	2	1	0	2	3	3	3	2	1	2	2	2	2	1	2	2	1	2	0	1	1	1	1	1	1	1	0	1	1	1	1	3	0	2	1	0	0	0	0	0	0	0	0	0	0	0	0	0	0
20	2	0	0	2	3	2	1	0	2	2	2	2	2	2	2	2	0	1	1	0	0	0	1	2	0	0	0	1	0	0	1	2	0	2	1	0	0	0	0	0	0	0	0	0	0	0	0	0	0
20	2	0	0	2	2	2	2	2	2	2	2	2	1	1	2	2	0	1	0	1	1	1	1	1	1	2	2	0	1	1	1	1	0	1	1	0	1	0	0	0	0	0	0	0	0	0	0	0	0
20	2	0	0	3	3	3	2	3	2	2	2	1	2	2	2	3	0	1	0	1	3	0	1	0	0	0	0	1	0	1	0	0	0	0	0	0	1	0	0	0	0	0	0	0	0	0	0	0	0
19	2	0	0	2	1	2	2	2	1	2	2	2	2	2	2	2	0	1	1	1	1	1	2	1	1	2	2	1	1	1	1	1	0	0	1	0	0	0	0	0	0	0	0	0	0	0	0	0	0
20	2	1	0	1	1	2	1	2	1	2	2	2	2	1	2	2	0	2	1	1	1	2	2	2	1	2	1	1	1	1	3	1	2	2	2	0	0	0	0	0	0	0	0	0	0	0	0	0	0
20	2	0	0	3	3	3	3	2	3	2	3	1	2	3	2	3	0	1	0	0	0	0	0	1	1	2	1	2	2	2	1	1	1	2	2	0	1	0	0	0	0	0	0	0	0	0	0	0	0
22	2	1	0	2	2	2	2	2	1	2	3	2	2	1	2	2	0	1	1	2	2	1	2	1	1	1	0	1	0	0	2	1	0	0	0	0	1	0	0	0	0	0	0	0	0	0	0	0	0
20	2	0	0	1	2	0	1	1	1	2	1	2	2	2	2	2	0	0	1	1	0	1	2	1	1	1	1	1	1	0	3	1	1	2	1	0	3	0	0	0	0	0	0	0	0	0	0	0	0
20	2	1	0	2	2	3	3	3	1	1	2	2	2	2	2	2	0	2	1	1	1	2	3	1	1	1	0	0	1	1	2	1	1	1	1	1	0	0	0	0	0	0	0	0	0	1	2	0	0
20	2	0	0	2	3	3	3	2	3	3	3	3	2	2	2	2	1	1	0	1	1	1	3	1	0	1	0	0	0	1	0	0	0	0	0	0	0	0	0	1	1	0	0	0	0	0	0	1	1
20	2	1	0	2	3	3	3	3	3	3	3	2	2	1	3	3	2	3	3	0	2	1	3	1	1	1	0	0	0	0	0	1	0	1	0	0	1	0	0	1	1	0	0	2	2	1	1	1	1
19	2	0	0	2	2	2	3	3	2	3	3	3	3	2	3	3	0	1	3	3	1	1	2	1	1	2	2	1	1	0	1	1	1	1	1	0	1	0	0	2	2	0	0	0	0	2	2	1	2
19	2	0	0	0	3	3	3	3	3	3	3	3	3	0	3	3	0	1	1	0	0	1	2	1	1	1	1	2	1	0	1	1	1	0	1	0	2	0	0	0	0	0	0	1	1	0	0	0	0
22	2	1	0	1	2	1	2	1	2	2	3	2	3	2	3	3	0	1	2	1	2	1	2	1	1	1	1	1	0	0	1	1	1	1	1	0	1	0	0	0	0	0	0	0	0	0	0	0	0
20	2	0	0	1	1	2	2	2	1	2	2	1	2	1	2	2	0	0	1	1	1	0	1	1	1	2	2	1	1	1	1	1	1	2	1	0	2	0	0	0	0	0	0	0	0	0	0	0	0
18	2	1	0	3	3	3	3	2	1	3	3	2	3	3	0	1	0	1	1	0	0	1	2	1	0	2	1	3	2	2	0	0	2	0	0	0	0	0	0	0	0	0	0	0	0	0	0	0	0
18	2	0	0	2	2	3	3	2	2	2	2	2	2	2	2	2	0	2	2	2	2	2	2	1	1	2	1	3	1	1	0	1	0	1	1	1	0	0	0	0	0	0	0	0	0	0	0	0	0
19	2	1	0	1	3	2	3	3	0	1	3	3	3	1	3	3	0	0	0	0	0	0	1	0	1	0	0	0	0	1	0	1	0	0	0	1	0	0	0	0	0	0	0	0	0	0	0	0	0
21	2	1	0	3	3	3	1	1	3	3	3	2	2	1	3	0	0	0	0	2	0	3	3	1	0	2	0	0	0	0	2	1	0	0	1	0	0	0	0	0	0	0	0	0	0	0	0	0	0
21	2	1	0	1	3	2	2	1	2	2	2	3	3	3	3	3	0	0	0	2	2	2	2	1	2	2	3	1	2	2	3	2	2	2	2	0	0	0	0	0	0	0	0	0	0	1	1	1	3
19	2	1	0	3	2	2	2	2	2	2	2	2	1	1	0	1	0	0	1	0	2	0	1	1	0	0	1	1	1	2	0	1	0	1	2	1	0	0	0	0	0	0	0	0	0	0	0	1	1
19	2	1	0	1	0	1	2	1	0	1	0	2	3	0	1	1	0	2	3	0	1	1	1	2	3	2	2	2	3	2	2	0	2	2	2	0	1	0	0	0	0	0	0	0	0	0	0	1	0
20	2	0	0	3	3	3	3	3	3	3	3	3	3	3	3	3	3	3	3	3	3	3	3	0	0	0	0	1	0	0	1	1	0	2	0	0	0	0	0	0	0	0	0	0	0	0	0	0	0
21	2	0	0	3	3	2	3	2	3	2	3	3	3	3	2	3	1	1	2	3	1	0	3	1	1	2	0	0	0	1	1	1	0	1	1	0	0	0	0	0	0	0	0	0	0	0	0	0	0
20	2	1	0	2	3	3	3	3	2	3	3	2	3	1	2	2	0	1	2	1	2	3	2	1	2	2	0	0	0	0	1	3	0	1	1	0	0	0	0	1	1	0	0	0	0	1	2	1	1
20	2	1	0	0	1	2	3	3	0	2	2	2	2	1	2	1	0	1	2	1	1	0	3	1	1	1	1	0	0	2	0	0	0	0	0	0	0	1	1	0	0	0	0	1	1	0	0	1	0
21	2	0	0	2	2	2	2	1	2	2	2	2	2	2	2	1	0	1	1	0	1	1	2	0	1	2	0	3	0	0	3	1	0	1	1	0	0	0	0	0	0	0	0	0	0	0	0	0	0
20	2	0	0	1	2	3	2	1	1	1	1	2	2	1	1	2	0	0	0	0	1	2	3	1	1	2	2	1	2	1	2	1	1	2	1	0	0	0	0	0	0	0	0	0	0	0	0	0	0
19	2	0	0	2	2	3	3	1	1	2	3	3	1	1	3	3	0	1	1	1	0	0	1	1	0	0	0	2	1	1	0	1	0	1	0	0	0	0	0	0	0	0	0	0	0	0	0	0	0
21	2	0	0	3	1	3	3	3	2	3	1	2	3	2	3	3	1	1	2	0	1	2	3	1	0	1	0	1	0	0	1	0	0	1	1	0	0	0	0	0	0	0	0	0	0	2	1	1	1
19	2	0	0	1	3	3	3	2	2	2	2	2	1	1	2	1	0	1	0	1	2	1	2	1	1	2	0	0	0	1	0	1	0	1	1	1	0	0	0	0	0	0	0	0	0	0	0	0	0
20	2	0	0	3	2	3	3	2	2	2	2	3	3	2	2	2	1	0	0	1	0	0	1	1	1	0	0	0	0	0	1	1	0	1	0	0	0	0	0	0	0	0	0	0	0	0	0	1	0
19	2	0	0	3	3	2	2	2	2	3	3	3	3	1	2	1	0	0	1	0	0	1	1	0	1	0	1	1	1	0	1	0	0	1	1	1	1	0	0	0	0	0	0	0	0	0	0	0	0
19	2	0	0	1	3	2	3	1	3	3	2	3	2	2	3	1	1	3	3	0	3	2	2	0	2	0	0	0	1	1	1	0	0	1	1	0	1	0	0	0	0	0	0	0	0	0	0	0	0
21	2	1	0	2	3	2	1	2	2	2	1	2	2	2	2	1	0	2	2	1	1	1	2	1	1	0	0	2	1	2	2	3	3	1	3	1	1	0	0	0	0	0	0	0	0	0	0	0	0
21	2	0	0	3	1	1	1	1	3	3	3	3	3	3	0	3	0	1	2	2	1	2	3	3	0	1	1	1	1	2	0	1	1	2	1	0	0	0	0	0	0	0	0	0	0	0	0	0	0
19	2	0	0	1	2	3	3	3	3	3	3	3	3	3	3	3	0	1	2	1	1	3	3	1	0	1	0	1	0	1	0	0	0	1	1	1	0	0	0	0	0	0	0	0	0	0	0	0	0
21	2	1	0	1	2	0	1	2	2	2	1	2	3	2	0	1	1	2	1	3	0	1	1	1	1	2	1	1	1	0	0	1	1	1	1	0	1	0	0	2	1	0	0	0	0	1	1	0	0
20	2	0	0	2	2	3	3	1	2	1	2	3	2	1	1	2	0	0	0	0	0	1	1	1	1	1	0	1	0	0	0	1	0	1	1	0	1	0	0	0	0	0	0	0	0	0	0	0	0
20	2	0	0	3	3	3	3	3	0	3	3	3	3	0	3	3	0	0	0	0	3	0	3	1	3	2	0	2	2	1	3	0	2	2	2	1	1	0	0	2	0	0	0	0	0	1	0	0	0
21	2	1	0	2	3	3	3	2	2	2	1	3	2	1	3	2	0	0	0	0	1	0	2	1	1	2	0	1	0	2	3	1	0	1	1	0	2	0	0	0	0	0	0	0	0	0	0	0	0
20	2	1	0	2	3	3	3	3	3	3	2	1	2	2	1	1	0	0	2	2	3	1	3	2	1	1	0	1	0	0	0	1	0	1	0	0	0	1	1	0	0	0	0	2	2	2	2	4	4
20	2	0	0	1	1	1	1	1	1	1	1	1	1	2	1	2	1	2	2	1	2	2	1	2	0	2	0	2	1	1	1	1	1	2	2	2	0	0	0	0	0	0	0	0	0	1	2	1	1
20	2	0	0	2	2	2	2	2	3	2	3	3	2	2	3	2	2	2	2	2	3	2	3	2	1	2	2	2	0	2	3	1	2	2	1	1	1	0	0	0	0	0	0	0	0	0	0	0	0
19	2	1	0	3	2	1	1	3	2	2	2	2	2	2	1	2	0	1	1	2	1	3	3	1	1	1	0	1	0	1	0	3	1	3	1	0	2	0	0	0	0	0	0	0	0	1	1	0	0
19	2	0	0	1	3	1	2	2	2	2	3	1	1	2	1	3	1	1	2	2	0	0	2	1	0	2	1	2	1	0	3	1	0	2	1	1	1	0	0	0	0	0	0	0	0	1	1	1	1
19	2	1	0	1	1	1	1	1	2	1	1	2	1	2	1	0	1	2	2	2	2	2	2	1	1	2	0	0	0	0	1	1	0	1	0	0	2	0	0	0	0	0	0	0	0	0	0	0	0
21	2	1	0	1	2	2	2	1	2	2	2	2	2	1	2	1	0	1	1	1	2	1	1	1	1	1	1	1	1	1	2	3	2	2	3	0	1	0	0	0	0	0	0	0	0	0	0	0	0
20	2	0	0	1	1	3	3	0	1	1	2	2	2	1	0	1	0	1	3	2	3	1	2	2	1	2	0	3	1	0	2	1	1	2	2	1	1	1	2	1	2	0	0	2	3	3	4	1	2
21	2	0	0	2	3	2	2	3	2	2	3	3	3	2	1	3	1	1	1	1	1	3	3	1	1	1	0	0	0	0	0	1	0	2	1	1	1	0	0	0	0	0	0	1	0	0	0	0	0
20	2	0	0	1	2	2	3	2	2	2	3	3	2	3	2	2	0	3	2	0	2	2	3	1	0	0	1	2	0	1	1	1	1	2	3	0	1	0	0	0	0	0	0	0	0	0	0	0	0
19	2	0	0	3	3	3	3	3	2	3	3	2	3	2	2	1	0	1	1	1	1	0	1	1	1	1	0	1	0	1	1	1	0	1	1	0	0	0	0	0	0	0	0	0	0	0	0	1	1
20	2	0	0	0	0	2	1	1	2	2	2	2	2	1	1	3	0	1	2	2	2	2	1	2	1	2	0	1	0	0	1	3	1	2	1	0	3	0	0	1	1	0	0	0	0	1	2	0	0
20	2	1	0	0	3	3	3	3	3	3	1	3	3	0	2	0	0	0	0	1	0	0	0	1	0	0	1	0	0	0	1	0	0	0	1	0	0	0	0	0	0	0	0	0	0	0	0	0	0
19	2	0	0	2	2	3	3	3	3	3	3	3	3	3	3	3	3	3	3	0	2	1	3	1	2	1	2	0	0	1	1	2	0	3	1	0	0	1	1	2	0	0	0	0	0	1	0	0	0
20	2	0	0	2	1	2	1	3	2	2	2	2	2	1	2	1	2	1	2	2	2	2	2	1	1	1	0	0	0	1	1	1	0	1	1	0	0	0	0	1	1	0	0	0	0	0	0	1	1
19	2	0	0	1	2	3	3	3	3	3	2	3	3	1	3	2	0	1	1	0	1	0	1	0	0	0	0	0	0	0	1	0	0	0	0	0	0	0	0	0	0	0	0	0	0	0	0	0	0
20	2	0	0	2	3	3	3	3	3	2	2	2	2	1	1	1	1	2	0	1	0	0	1	1	1	2	0	1	0	1	0	2	0	1	1	0	0	1	1	1	0	0	0	2	2	1	0	1	1
20	2	0	0	3	1	1	0	1	0	3	1	2	2	1	1	1	0	0	1	0	0	0	3	1	1	1	0	1	0	1	0	0	0	1	1	0	2	0	0	0	0	0	0	0	0	0	0	1	0
20	2	0	0	3	1	2	2	2	1	2	2	2	1	1	2	1	2	0	0	1	0	2	3	1	0	2	2	1	2	0	3	1	1	1	2	1	0	1	0	0	0	0	0	1	0	1	0	0	0
22	2	1	0	2	3	2	2	3	2	2	2	2	2	2	2	2	1	2	1	1	1	1	2	1	1	2	0	1	1	1	0	1	2	1	1	0	0	0	0	0	0	0	0	0	0	0	0	0	0
20	2	0	0	3	1	3	3	3	2	2	1	1	2	3	3	3	0	2	0	0	1	3	3	1	0	2	0	2	3	0	0	1	1	1	1	1	0	0	0	0	0	0	0	0	0	0	0	0	0
20	2	0	0	0	3	2	2	2	3	3	1	2	2	3	2	1	0	2	2	0	3	3	3	2	2	3	3	2	2	1	1	0	3	1	2	1	1	0	0	0	0	0	0	1	0	1	1	0	0
20	2	1	0	1	3	1	2	2	2	2	3	3	2	2	2	2	1	1	1	1	1	2	2	1	1	2	1	3	1	2	1	1	1	1	1	0	1	0	0	0	0	0	0	0	0	0	0	0	0
19	2	0	0	2	3	2	2	2	2	2	2	2	2	3	1	2	0	1	1	1	1	1	2	1	0	1	0	1	0	1	1	1	0	1	0	1	0	0	0	0	0	0	0	0	0	0	0	0	0
21	2	1	0	3	3	2	3	3	2	2	3	2	2	1	2	2	0	1	1	3	0	2	3	1	0	0	0	0	0	0	0	1	0	1	1	0	0	1	1	0	0	0	0	0	0	0	0	0	0
18	1	1	0	2	3	2	3	3	2	2	2	3	3	3	2	3	2	0	0	1	1	0	1	1	1	0	0	0	0	1	1	1	0	0	0	0	1	0	0	0	0	0	0	0	0	0	0	0	0
18	1	1	0	2	2	2	3	3	2	2	1	1	2	1	2	3	2	1	1	1	1	1	2	1	1	2	1	1	1	2	1	3	1	1	1	1	2	0	0	1	2	0	0	1	1	1	1	0	0
18	1	0	0	2	3	3	2	3	2	3	3	3	3	2	2	1	2	1	0	2	1	0	2	1	1	2	1	1	1	1	0	1	0	2	1	0	1	0	0	4	0	0	0	0	0	0	0	0	0
19	1	0	0	1	2	3	3	2	1	2	1	1	3	2	2	2	0	0	1	2	1	2	3	1	1	0	1	0	0	2	2	1	0	1	1	0	0	0	0	2	2	0	0	0	0	2	3	0	0
19	1	0	0	3	3	3	3	2	2	3	1	2	3	1	1	1	0	0	0	0	1	0	3	1	0	1	0	0	0	0	0	1	0	1	1	0	0	0	0	0	0	0	0	0	0	0	0	0	0
19	1	0	0	3	2	2	1	3	1	2	2	3	1	3	3	3	3	3	3	1	3	0	2	1	1	0	3	0	1	0	0	0	0	1	1	1	1	0	0	0	0	0	0	0	0	0	0	0	0
18	1	0	0	2	3	3	3	2	2	2	2	2	1	2	1	1	0	0	1	1	1	1	1	1	0	2	0	1	0	1	0	1	1	1	1	0	2	0	0	0	0	0	0	1	1	0	0	0	0
19	1	1	0	1	2	1	1	1	2	1	1	1	1	0	2	3	1	1	0	1	1	2	1	2	1	1	2	1	1	2	1	0	1	2	2	1	0	0	0	1	1	0	0	1	1	0	0	0	0
18	1	0	0	3	3	3	3	3	2	3	3	2	2	3	3	2	1	1	2	2	1	0	1	1	0	1	0	0	0	1	0	1	0	1	1	0	2	0	0	0	0	0	0	0	0	1	1	0	0
19	1	0	0	2	2	2	2	3	2	1	1	2	2	2	1	1	1	1	1	1	1	1	1	1	1	2	1	1	0	2	2	1	0	1	1	1	1	0	0	0	0	0	0	0	0	1	1	0	0
18	1	0	0	1	3	2	2	3	2	3	3	1	3	3	1	2	0	0	0	1	2	0	2	1	1	2	0	1	1	0	2	1	1	2	2	1	0	0	0	0	0	0	0	0	0	0	0	0	0
18	1	0	0	2	3	1	1	1	3	2	2	2	1	1	0	2	0	0	0	0	0	0	0	1	0	2	1	0	1	0	0	1	1	1	1	0	0	0	0	0	0	0	0	1	1	0	0	1	2
18	1	1	0	3	3	2	1	2	3	3	2	2	1	3	2	1	2	0	0	2	1	1	2	2	1	1	0	1	0	2	0	1	1	1	1	0	1	0	0	0	0	0	0	1	0	0	0	0	0
20	1	0	0	3	1	2	3	3	1	1	1	1	1	2	2	2	2	2	1	1	1	1	1	2	0	1	2	1	3	1	3	1	2	2	1	3	0	0	0	0	0	0	0	3	3	4	4	2	3
19	1	0	0	1	2	0	1	3	1	2	1	0	2	3	2	1	1	2	2	3	1	2	3	2	0	1	3	3	3	0	0	1	2	2	3	1	1	0	0	0	0	0	0	0	0	0	0	0	0
19	1	1	0	0	1	0	1	1	2	0	1	1	2	0	1	1	0	2	2	1	2	0	1	2	1	2	1	2	1	2	0	0	2	2	2	0	1	0	0	0	0	0	0	0	0	0	0	0	0
18	1	0	0	1	2	1	1	1	1	2	2	2	2	0	1	3	0	1	2	1	1	1	2	1	1	2	1	2	1	1	1	1	1	2	2	1	1	0	0	0	0	0	0	0	0	0	0	0	0
19	1	0	0	1	3	3	3	3	2	2	2	2	2	2	2	2	0	0	0	0	0	0	2	1	0	2	0	0	0	0	0	1	0	0	1	0	1	0	0	0	0	0	0	0	0	0	0	0	0
19	1	1	0	1	3	2	2	1	2	2	3	3	3	1	2	3	0	1	1	1	0	2	3	1	1	1	2	2	2	0	3	2	2	2	1	0	1	0	0	0	0	0	0	0	0	0	0	0	0
18	1	0	0	2	3	3	3	2	2	2	1	3	3	1	2	1	0	0	1	0	2	1	2	1	0	2	0	1	0	0	1	3	0	1	1	0	1	0	0	0	0	0	0	0	0	1	2	0	0
21	1	0	0	2	2	2	2	3	2	1	2	1	1	1	2	0	0	2	2	2	2	2	2	1	2	2	2	2	2	1	3	3	2	3	3	1	1	0	0	0	0	0	0	0	0	0	0	1	2
18	1	0	0	2	1	1	1	1	3	3	1	2	3	3	2	2	0	1	1	0	0	0	0	1	2	2	1	2	1	0	2	1	1	2	1	0	0	0	0	0	0	0	0	0	0	0	0	0	0
19	1	0	0	3	0	1	1	3	3	3	0	1	1	2	3	3	3	3	3	0	3	0	3	1	2	1	3	0	1	1	2	1	2	2	2	2	1	0	0	0	0	0	0	0	0	0	0	0	0
19	1	0	0	3	3	3	3	2	2	3	3	3	2	1	2	1	0	0	1	0	2	1	1	0	0	1	0	0	0	0	0	1	0	1	0	0	0	0	0	0	0	0	0	0	0	1	1	1	1
19	1	1	0	3	0	3	3	3	3	3	0	2	2	3	3	3	0	0	1	0	1	0	3	1	0	0	0	1	0	0	0	0	0	1	0	0	0	1	1	0	0	0	0	1	1	0	0	1	1
19	1	1	0	2	1	2	3	3	1	2	3	3	3	1	3	2	0	1	1	2	1	1	2	1	1	0	1	1	1	0	1	1	1	3	1	0	2	1	2	1	2	2	1	2	2	1	2	2	3
19	1	0	0	2	0	1	1	2	2	2	1	1	1	1	2	2	1	1	1	0	0	0	0	1	0	2	0	0	0	1	1	0	0	1	1	0	0	0	0	0	0	0	0	0	0	2	0	1	0
18	1	0	0	2	3	2	2	3	1	2	3	1	1	3	1	3	0	1	3	2	3	3	3	1	1	0	0	0	0	2	2	1	1	1	0	0	0	0	0	0	0	0	0	0	0	1	1	1	2
21	3	0	0	1	2	3	3	3	1	3	3	2	3	1	1	3	0	0	0	0	1	0	0	2	1	1	1	3	1	2	1	0	1	2	3	1	2	0	0	4	1	0	0	0	0	0	0	0	0
19	1	0	0	2	3	3	3	3	3	2	3	2	2	3	3	2	0	2	2	1	2	3	3	1	1	2	0	1	0	1	0	2	0	1	1	0	0	0	0	0	0	0	0	0	0	0	0	0	0
21	2	1	0	3	2	3	3	2	3	3	3	2	2	3	3	3	0	0	0	1	2	0	1	2	1	1	0	1	0	1	2	1	0	1	1	0	0	0	0	0	0	0	0	0	0	0	0	0	0
19	1	0	0	3	1	2	2	1	2	2	1	2	2	2	2	2	1	0	0	1	1	2	3	2	1	2	1	2	1	1	1	2	1	2	2	1	0	0	0	0	0	0	0	0	0	0	0	0	0
22	3	0	0	3	3	3	3	3	3	1	3	3	3	0	3	1	0	0	3	3	3	0	3	1	1	0	0	1	0	0	0	0	0	0	1	0	0	0	0	0	0	0	0	0	0	0	0	0	0
20	3	1	0	3	3	2	3	3	1	2	2	3	3	1	2	2	1	0	1	1	0	1	1	1	1	1	0	0	0	1	1	1	0	2	1	0	0	0	0	0	0	0	0	0	0	0	0	0	0
21	3	0	0	2	2	2	2	2	2	2	2	2	2	2	2	2	2	2	2	2	2	2	2	1	1	1	2	1	1	1	1	1	0	2	1	1	1	0	0	0	0	0	0	0	0	0	0	0	0
21	3	1	0	1	1	1	1	1	1	1	1	1	1	1	2	0	0	0	1	1	1	1	1	2	1	2	1	2	1	2	0	0	1	2	2	0	3	0	0	2	1	0	0	0	0	0	0	0	0
18	1	0	0	2	1	3	3	2	2	2	2	2	2	2	2	2	2	1	2	1	1	2	2	1	1	1	0	0	0	1	1	1	0	1	1	0	0	0	0	0	0	0	0	0	0	0	0	0	0
19	1	0	0	3	3	3	2	2	2	2	2	3	2	2	2	2	1	0	0	1	1	0	1	1	1	1	0	1	0	1	0	1	0	1	1	1	0	2	1	0	0	0	0	0	0	0	0	0	0
[truncated: 28 more columns]
